1 **Genome-wide alternative splicing profiling in the fungal plant pathogen *Sclerotinia***  
2 ***sclerotiorum* during the colonization of diverse host families**

3

4 **Heba M. M. Ibrahim<sup>\*1,2,3</sup>, Stefan Kusch<sup>1,4</sup>, Marie Didelon<sup>1</sup>, Sylvain Raffaele<sup>1</sup>**

5

6 <sup>1</sup>LIPM, Université de Toulouse, INRAE, CNRS, 31326 Castanet-Tolosan, France

7 <sup>2</sup>Genetics Department, Faculty of Agriculture, Cairo University, 12613, Giza, Egypt

8 <sup>3</sup>Current address: Plant Health and Protection, Division of Plant Biotechnics, Department of  
9 Biosystems (BIOSYST), Faculty of Bioscience Engineering, KU Leuven, Belgium

10 <sup>4</sup>Current address: Unit of Plant Molecular Cell Biology, Institute for Biology I, RWTH Aachen  
11 University, 52056, Aachen, Germany

12

13 \*Corresponding author: [heba.ibrahim@kuleuven.be](mailto:heba.ibrahim@kuleuven.be); +32 16 32 41 20

14

15 **Abstract**

16 *Sclerotinia sclerotiorum* is a notorious generalist plant pathogen that threatens more than 600  
17 host plants including wild and cultivated species. The molecular bases underlying the broad  
18 compatibility of *S. sclerotiorum* with its hosts is not fully elucidated. In contrast to higher plants  
19 and animals, alternative splicing (AS) is not well studied in plant pathogenic fungi. AS is a  
20 common regulated cellular process that increases cell protein and RNA diversity. In this study,  
21 we annotated spliceosome genes in the genome of *S. sclerotiorum* and characterized their  
22 expression *in vitro* and during the colonization of six host species. Several spliceosome genes  
23 were differentially expressed *in planta*, suggesting that AS was altered during infection. Using  
24 stringent parameters, we identified 1,487 *S. sclerotiorum* genes differentially expressed *in*  
25 *planta* and exhibiting alternative transcripts. The most common AS events during the  
26 colonization of all plants were retained introns and alternative 3' receiver site. We identified *S.*  
27 *sclerotiorum* genes expressed *in planta* for which (i) the relative accumulation of alternative  
28 transcripts varies according to the host being colonized and (ii) alternative transcripts harbor  
29 distinct protein domains. This notably included 42 genes encoding predicted secreted proteins  
30 showing high confidence AS events. This study indicates that AS events are taking place in the  
31 plant pathogenic fungus *S. sclerotiorum* during the colonization of host plants and could  
32 generate functional diversity in the repertoire of proteins secreted by *S. sclerotiorum* during  
33 infection.

34

35 **Keywords**

36 *Sclerotinia sclerotiorum*, alternative splicing, host adaptation, computational analysis, isoforms,  
37 RNA sequencing (RNA-seq)

38

39

## 40 Introduction

41 *Sclerotinia sclerotiorum* is a plant parasitic fungus that causes the white mold disease. It is  
42 known for its aggressive necrotrophic life style, which means that the fungus actively kills the  
43 plant host cells and thrives by feeding on the dead plant material, and for exhibiting a broad  
44 host range. *S. sclerotiorum* can infect more than 600 host plants including economically  
45 important species, such as tomato (*Solanum lycopersicum*), sunflower (*Helianthus annuus*),  
46 common bean (*Phaseolus vulgaris*), and beetroot (*Beta vulgaris*) (Boland and Hall, 1994; Naito  
47 and Sugimoto, 2011; Peltier et al., 2012).

48 Studies on broad host range plant pathogens largely focused on the function of virulence-  
49 related proteins and the transcriptional control of infection, but the molecular bases underlying  
50 the infection of diverse host plants are still not fully understood (Liang & Rollins, 2018).  
51 *S. sclerotiorum* synthesizes and secretes oxalic acid in order to establish successful colonization  
52 of host plants (Liang & Rollins, 2018). Further, *S. sclerotiorum* employs large numbers of  
53 cellulases, peptidases and toxins that assist in the necrotrophic infection process (Friesen *et al.*,  
54 2008; Derbyshire *et al.*, 2017). Many plant pathogens employ secreted proteins functioning  
55 specifically on certain host genotypes to facilitate infection (Friesen *et al.*, 2008; Rodriguez-  
56 Moreno *et al.*, 2018), suggesting that the ability to infect very diverse host species would  
57 associate with expanded repertoires of secreted proteins. However, the repertoire of secreted  
58 protein coding genes in *S. sclerotiorum* is within the average for Ascomycete fungal pathogens  
59 (Derbyshire *et al.*, 2017). Instead of an expanded secretome, *S. sclerotiorum* exhibits codon  
60 usage optimization for secreted proteins, highlighting that a remarkably efficient protein  
61 translation system of virulence factors may support plant infection processes in *S. sclerotiorum*  
62 (Badet *et al.*, 2017). In addition, *S. sclerotiorum* hyphae organize in cooperating units, sharing  
63 the metabolic cost of virulence and growth during the colonization of resistant plants (Peyraud  
64 *et al.*, 2019). Here, we investigated the extent to which posttranscriptional regulation could  
65 generate diversity in virulence factor candidates produced by *S. sclerotiorum* during the  
66 colonization of plants from diverse botanical families.

67 Alternative splicing (AS) is a process in eukaryotic cells that increases the cellular capacity to  
68 shape their transcriptome diversity and proteome complexity. Splicing is an important

69 mechanism that regulates the maturation of the precursor messenger RNAs (pre-mRNA) by  
70 subjecting it to the removal of non-coding sequences (introns). AS occurs in many eukaryotes  
71 under certain conditions resulting in multiple isoforms of transcripts that retain specific intronic  
72 sequences or lack specific exonic sequences. The transcripts with retained introns (RI) then  
73 have a prolonged lifetime compared to the completely mature mRNA transcript (Braunschweig  
74 *et al.*, 2014; Schmitz *et al.*, 2017; Naro *et al.*, 2017).

75 The efficiency and accuracy of the splicing mechanisms play a critical role in gene transcription  
76 and subsequent protein function. Imprecise splicing may result in abnormal and non-functional  
77 transcripts that may lead to the production of defective proteins, thus disturbing cellular  
78 processes. Previous studies showed that inaccurate splicing may cause diseases in humans and  
79 increases plant sensitivity to abiotic or biotic stresses (Cui *et al.*, 2014). In line with this, the  
80 importance of AS in plant immunity against pathogen attacks is well established (Rigo *et al.*,  
81 2019). AS regulation and the factors that control it, the prediction of their *cis*-regulatory  
82 sequences and *trans*-acting elements have been intensively studied in plants and in animals  
83 (Blanco & Bernabeu, 2011; Eckardt, 2013; Zhang *et al.*, 2017), while only few reports are  
84 available from fungal phytopathogens. Therefore, the extent to which AS is regulated and  
85 functional during host colonization in fungal phytopathogens remains elusive.

86 Recently, (Jin *et al.*, 2017) found that transcripts of the plant fungal pathogen *Verticillium*  
87 *dahliae* undergo splicing of retained introns producing different isoforms of transcripts. These  
88 isoforms have predicted roles in controlling many conserved biological functions, such as ATP  
89 synthesis and signal transduction. The involvement and regulation of the retained intron  
90 isoforms and splicing during the infection of host plants are still unexplored. Moreover, AS is  
91 detected during *V. dahliae* microsclerotia development (Xiong *et al.*, 2014). Interestingly, 90%  
92 of the detected alternative transcripts exhibit retained introns. However, there is no further  
93 evidence to support the contribution of AS in microsclerotia development. In the same fashion,  
94 alternative transcripts are annotated in the genomes of the plant-pathogenic fungi  
95 *Colletotrichum graminicola* and *Fusarium graminearum* (Zhao *et al.*, 2013; Schliebner *et al.*,  
96 2014).



97 Alternative splicing is pivotal in regulating gene expression and in diversification of the protein  
98 repertoire in the plant-pathogenic oomycete *Pseudoperonospora cubensis* during pathogen  
99 development and transition from sporangia to zoospores (Burkhardt *et al.*, 2015). In this study  
100 4,205 out of 17,558 genes with *ca* 10,000 potential AS events were identified, of which *ca* 83%  
101 had evidence of retained introns. Interestingly, no exon skipping events were detected.  
102 Intriguingly, two genes encoding putative secreted RXLR and QXLR effectors showed evidence  
103 for retained intron specifically at the sporangia stage, while the spliced version was abundant  
104 during the host-associated stage. The retained intron may therefore regulate gene expression  
105 instead of affecting the function of the protein. Similarly, alternative splicing of the genes  
106 encoding glyceraldehyde-3-phosphate dehydrogenase (GAPDH) and 3-phosphoglycerate kinase  
107 (PGK) modulates their localization in the smut fungus *Ustilago maydis*. In particular, alternative  
108 splicing gives rise to GAPDH carrying a peroxisome targeting signal. Importantly, *U.*  
109 *maydis* mutants lacking the specific isoforms with peroxisomal localization have reduced  
110 virulence (Freitag *et al.*, 2012). These examples highlight the crucial role of AS in the  
111 pathogenicity of plant-pathogenic fungi.

112 A predicted splicing factor 8 corresponding to the U5-associated component Prp8 (GenBank  
113 accession number SS1G\_03208) was reported recently from *S. sclerotiorum* (McLoughlin *et al.*,  
114 2018). This prompted us to test for AS in *S. sclerotiorum* during the infection of diverse host  
115 plants. To this end, we exploited RNA-seq data of *S. sclerotiorum* infecting host plants from six  
116 botanical families, i.e. *Arabidopsis thaliana* (Brassicales), tomato (Solanales), sunflower  
117 (Asterales), beetroot (Caryophyllales), castor bean (*Ricinus communis*, Malphigiales), and  
118 common bean (Fabales), in addition to the RNA-seq of *S. sclerotiorum* cultivated *in vitro* as  
119 control (Peyraud *et al.*, 2019; Sucher *et al.*, 2020). We found that *S. sclerotiorum* has a  
120 functional splicing machinery and that at least 4% of the *S. sclerotiorum* secretome undergo  
121 alternative splicing regulation resulting in multiple differentially expressed isoforms that may  
122 have modified or altered functions. Some of the novel transcripts exhibit different predicted  
123 function or localization. Based on our analysis, we suggest that AS has the potential to give rise  
124 to transcriptional flexibility, thus contributing to the broad host spectrum of the plant  
125 pathogenic fungus *S. sclerotiorum*.

126

127

## 128 **Results**

129

### 130 ***S. sclerotiorum* spliceosome is differentially regulated during host colonization**

131 To study alternative splicing in the fungal plant pathogen *S. sclerotiorum*, we first searched the  
132 predicted proteome of *S. sclerotiorum* for components associated with splicing (spliceosome)  
133 using BLASTP and UniProtKB. We identified all the main components encompassing the entire  
134 pre-mRNA splicing cycle, i.e. U1/U2/U4/U5/U6-associated components, PRP19/NTC complex  
135 proteins, the proteins catalyzing the splicing of the intron (exon junction complex; EJC), the  
136 mRNA export complex TREX, and the mRNA and intron release components PRP43 and PRP22  
137 (**Figure 1**).

138 We documented the transcriptional regulation of *S. sclerotiorum* spliceosome components  
139 during plant infection by exploiting RNA-seq reads of *S. sclerotiorum* 1980 cultivated *in vitro* on  
140 PDA medium (Peyraud *et al.*, 2019) and during the infection of host plants from six botanical  
141 families (Sucher *et al.*, 2020): *A. thaliana* (*At*), tomato (*Solanum lycopersium*, *Sl*), sunflower  
142 (*Helianthus annuus*, *Ha*), common bean (*Phaseolus vulgaris*, *Pv*), castor bean (*Ricinus*  
143 *communis*, *Rc*), and beetroot (*Beta vulgaris*, *Bv*) (**Figure 1**). We found 116 proteins likely  
144 associated with (alternative) splicing, all but one of which were expressed at >10 FPKM across  
145 all conditions (**Figure 1; Supplementary Table 1**). *Sscl02g018420*, encoding a U2AF, was not  
146 expressed at detectable levels (FPKM < 1). By performing BLASTP searches we identified 81 of  
147 these 116 spliceosome-associated genes to be conserved in related *Ascomycetes*, such as  
148 *Botrytis* species (**Supplementary Table 2**). Interestingly, many components exhibited strongest  
149 expression *in vitro*, but appeared to be down-regulated on some or all of the hosts. Eighty of  
150 the 116 genes were significantly down-regulated (p<0.01) on at least one host plant, and one  
151 gene (*Sscl03g031850*, encoding a U2AF) was up-regulated on all hosts except sunflower  
152 (**Supplementary Table 3**). For example, 63 components were down-regulated on *B. vulgaris*,  
153 while the U2AF-encoding gene *Sscl03g031850* displayed 4.7-fold up-regulation during  
154 infection of *B. vulgaris* (**Figure 1**). Overall, 81 of the 116 components appeared to be

155 differentially modulated dependent on the host plant, suggesting host plant-specific regulation  
 156 of the spliceosome in *S. sclerotiorum*.

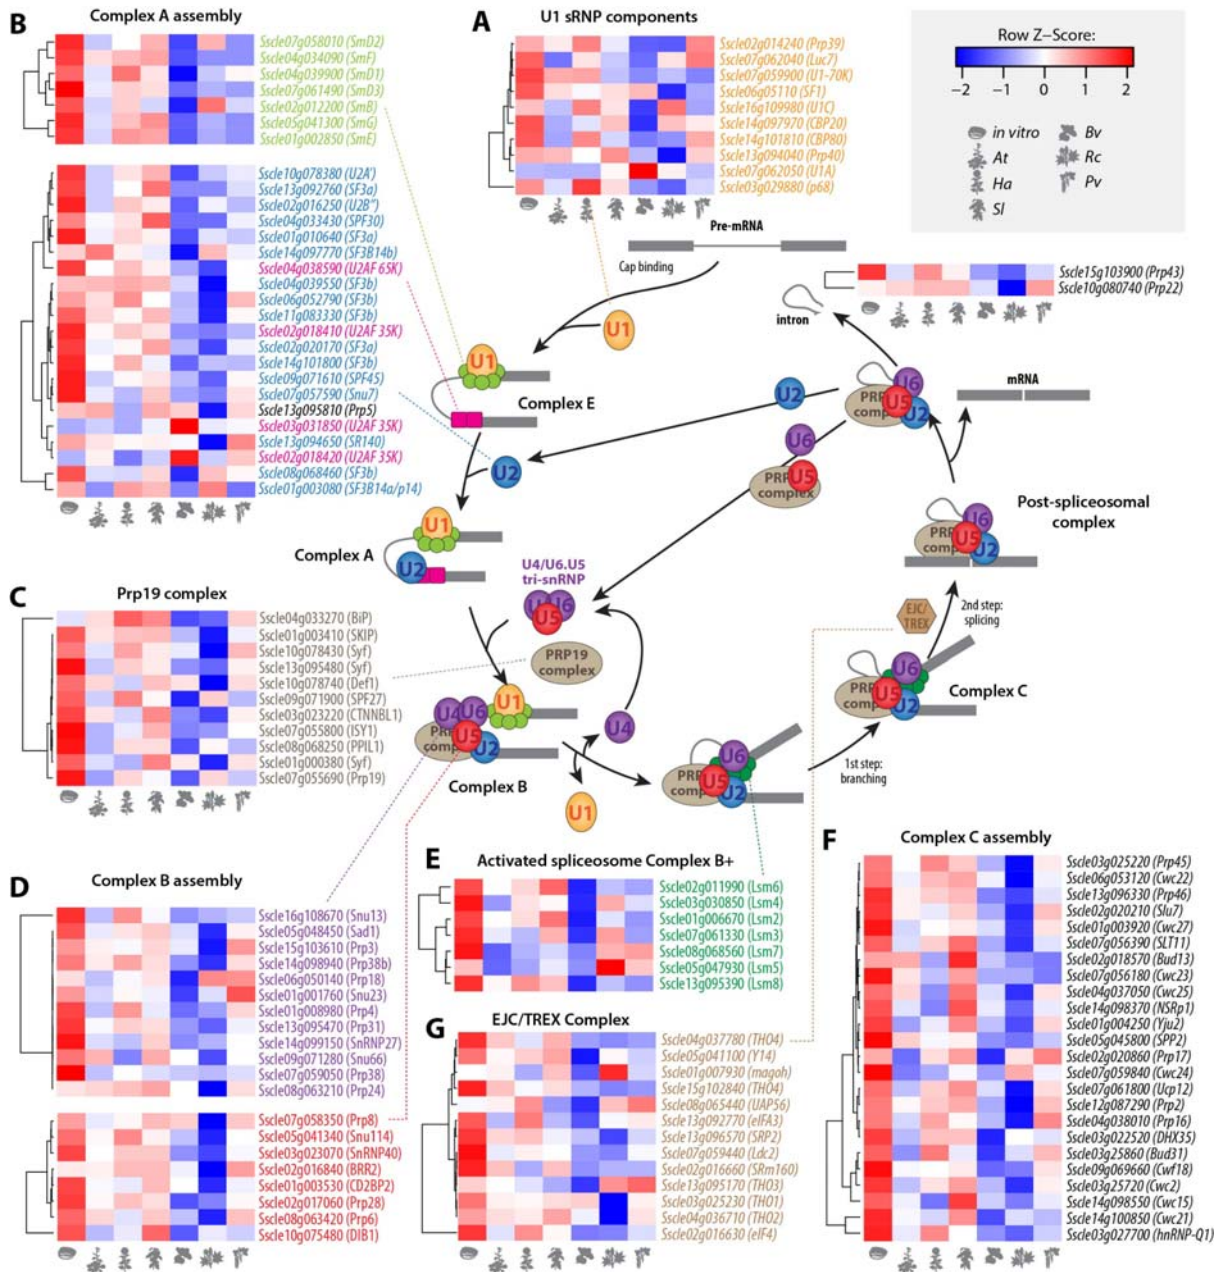

157  
 158  
 159 **Figure 1. Identification of *S. sclerotiorum* spliceosome components and their transcriptional regulation during**  
 160 **the infection of plants from six botanical families.** Diagrammatic representation of mRNA splicing process  
 161 featuring *S. sclerotiorum* genes involved in each step. A hypothetical pre-mRNA molecule is depicted with two  
 162 exons shown as dark grey boxes and an intron shown as dark grey line. Circles, rounded rectangles and hexagon  
 163 show protein complexes. The relative gene expression for 116 spliceosome genes at the edge of *S. sclerotiorum*

164 mycelium during infection of plants from six species and *in vitro* is shown as heatmaps. Pre-mRNA splicing involves  
165 multiple spliceosomal complexes. First, complex E is established by binding of U1 snRNP (**A**) to small nuclear  
166 ribonucleoprotein-associated proteins (Sm), U2 associated factors (U2AF) and splicing factors (SF), leading to the  
167 recruitment of U2 and the formation of Complex A (**B**). The PRP19C/Prp19 complex/NTC/Nineteen complex (**C**)  
168 stabilizes the U4/U5/U6 tri-snRNP spliceosomal complex leading to Complex B assembly (**D**). The U1/U4 snRNPs  
169 are released to form the activated spliceosome complex B+ (**E**) triggering branching, intron excision,  
170 conformational rearrangements into complex C (**F**) and ligation of the proximal and distal exons. EJC/TREX is  
171 recruited to spliced mRNAs to mediate export to the cytoplasm (**G**). *At*, *Arabidopsis thaliana*; *Bv*, *Beta vulgaris*; *Ha*,  
172 *Helianthus annuus*; *Pv*, *Phaseolus vulgaris*; *Rc*, *Ricinus communis*; *Sl*, *Solanum lycopersicum*.

173

### 174 **Alternatively-spliced genes are differentially expressed during host infection**

175 To search for alternative splicing events in the *S. sclerotiorum* transcriptome *in planta* and to  
176 reduce false discovery rate due to pipeline-dependent bias, we applied a stringent strategy  
177 based on two pipelines employing either transcriptome alignment or *de novo* transcriptome  
178 assembly (**Figure 2A**). Transcriptome alignment is a robust and effective method of  
179 characterizing transcripts that are mapped to a provided reference transcriptome (including  
180 isoforms with skipped exons) while *de novo* transcriptome assembly mainly focuses on  
181 recovering transcripts with segments of the genome that are missing from the transcriptome  
182 alignment method, including retained introns (Martin & Wang, 2011).

183 In the transcriptome alignment pipeline (**Figure 2A**), the trimmed reads (steps I and II) were  
184 aligned to the *S. sclerotiorum* 1980 reference genome (Derbyshire *et al.*, 2017) (step III).  
185 Expression of transcripts (transcripts per million, TPM) was determined in Salmon with the  
186 QUASI mapping algorithm (Patro *et al.*, 2017) and Kallisto (Bray *et al.*, 2016). Next, we used  
187 SUPPA2 to identify differentially expressed (DE) transcripts (step IV), with a cut-off TPM >30  
188 and p-value <0.05 (Trincado *et al.*, 2018). We found 6,399 DE transcripts in total with this  
189 approach among all samples (lesion edge on six plant species) and compared to the control  
190 (edge *S. sclerotiorum* cultivated *in vitro* on PDA medium). Then, SUPPA2 was applied to DE  
191 genes to identify the different alternative splicing (AS) events and to measure the percent  
192 spliced in index (PSI;  $\psi$ ), which represent the ratio between reads excluding or including exons  
193 (step V). These PSI values indicate the inclusion of sequences into transcripts (Wang *et al.*,  
194 2008; Alamancos *et al.*, 2015) using the normalized transcript abundance values (TPM) of the

195 isoforms from Salmon. The differential splicing analysis of the events (dpsi values) at  $p < 0.05$   
196 identified 1,369 DE genes with significant splicing events producing 3,409 DE transcripts (**Figure**  
197 **2A, B**).

198 In the *de novo* assembly pipeline, transcripts were assembled from fungal reads using StringTie.  
199 To identify fungal reads in our samples, the trimmed reads (step I and II) were aligned to the *S.*  
200 *sclerotiorum* 1980 reference genome (Derbyshire *et al.*, 2017) using HISAT2 (Kim *et al.*, 2015),  
201 yielding between 10,258,270 and 26,314,353 mapped reads per sample (**Supplementary**  
202 **Table 4**) (step III). *S. sclerotiorum* reads were then used for *de novo* transcriptome assembly in a  
203 modified Tuxedo differential expression analysis pipeline (Trapnell *et al.*, 2010, 2012). Since  
204 StringTie was proven to be a more accurate and improved transcript assembler and quantifier  
205 (Pertea *et al.*, 2015, 2016), we used StringTie instead of cufflinks for the *de novo* assembly step  
206 (step III' and III''). This resulted in 3,393 transcripts, including 2,633 transcripts from genes  
207 present in the reference transcriptome of *S. sclerotiorum* isolate 1980 (Derbyshire *et al.*, 2017),  
208 410 gene fusions and 337 novel genes encoding 350 transcripts. Differential expression analysis  
209 on the complete transcriptome including both reference and novel transcripts with cuffdiff  
210 (step IV) identified 4,111 DE genes accounting for 4,735 DE transcripts on any of the six host  
211 species compared to the control. Out of those, there were 368 genes that encoded several DE  
212 transcripts each, producing 772 transcripts in total. These represent candidate genes harboring  
213 alternative splicing *in planta* (step V).

214 Finally, we compared transcripts identified with the two pipelines and found a total number of  
215 3,671 transcripts differentially expressed *in planta* in total, originating from 1,487 genes ('full  
216 set' of candidates). Among those, the two pipelines identified a common set of 250 genes of *S.*  
217 *sclerotiorum* encoding more than one transcript and expressed differentially *in planta*  
218 ('common set' of candidates, **Figure 2B** and **Supplementary Figure 1**). This common set of  
219 genes produced 510 transcripts differentially expressed *in planta*. To homogenize alternative  
220 splicing event predictions on these genes, we re-run SUPPA2 to calculate PSI values for genes  
221 from the common and full sets of candidates. This identified 1,086 high confidence AS events in  
222 the full set of genes and 184 high confidence AS events in the common set of genes.

223

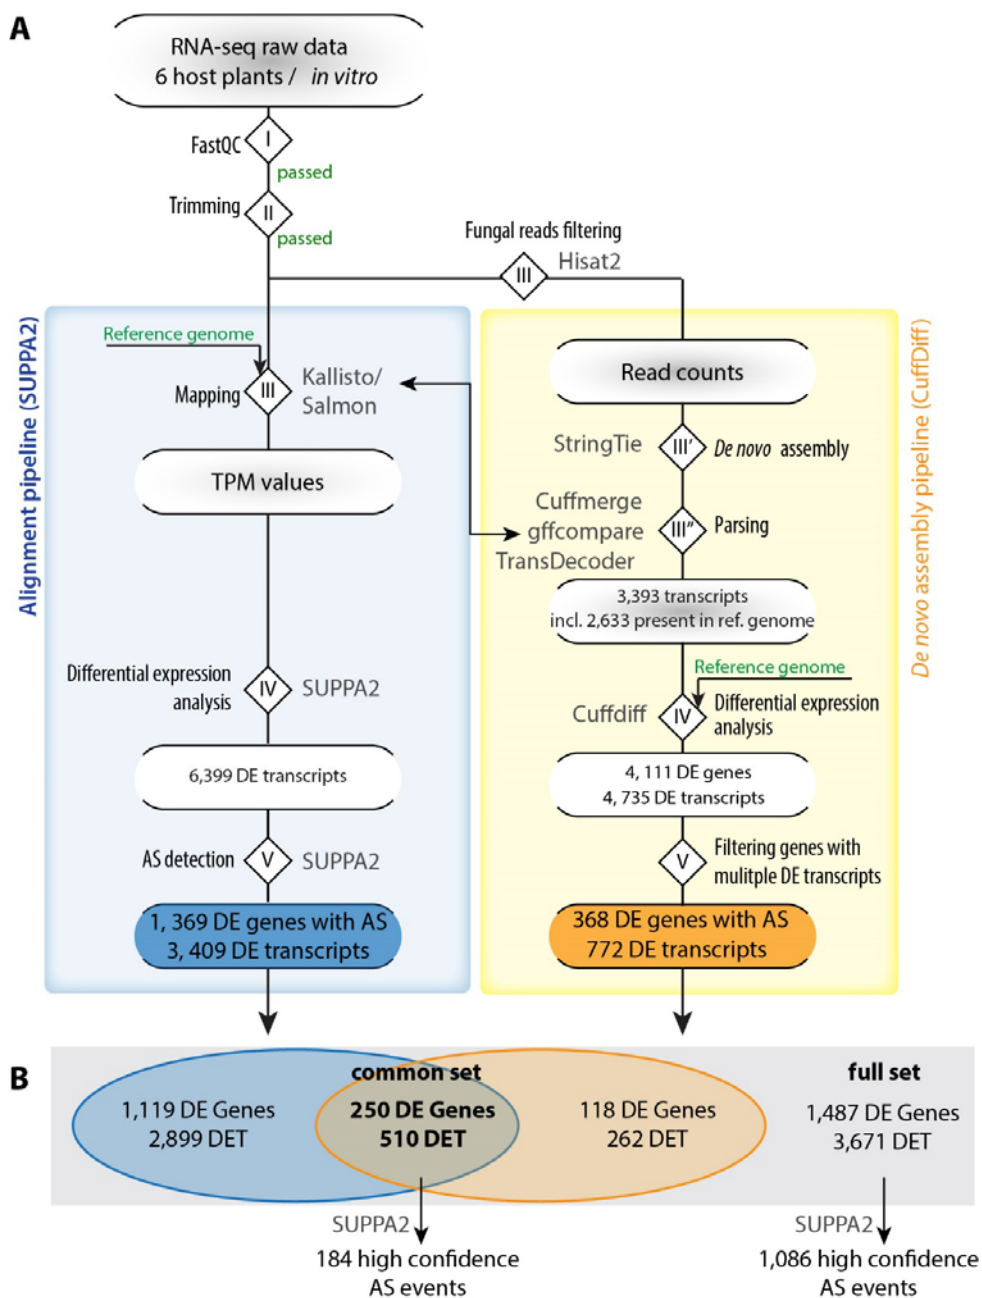

224  
 225 **Figure 2. Pipeline for genome-wide detection of alternative splicing in *S. sclerotiorum*.** (A) Raw RNA-seq data was  
 226 first inspected with FastQC (I) and quality-trimmed using Trimmomatic (II). We then applied two pipelines for  
 227 detection and analysis of novel transcripts, the *de novo* assembly pipeline (yellow box) and the transcriptome  
 228 alignment pipeline (blue box). For detection of novel transcripts, we mapped reads with HISAT (III) to the *S.*  
 229 *sclerotiorum* reference genome; this data was used in a modified StringTie *de novo* assembly (III'). Using  
 230 Cuffmerge, gffcompare and Transdecoder, we identified novel transcripts compared with the reference gene  
 231 annotation (III'') and generated a new reference annotation. Using the new annotation and the reference genome,  
 232 we performed differential expression analysis (IV) and filtered the differentially expressed (DE) genes for those

233 encoding at least two DE transcripts (DET; V). In the transcriptome alignment pipeline, mapping was done with  
234 Kallisto or Salmon (III), DE analysis and alternative splicing detection with SUPPA2 (IV and V). **(B)** A venn diagram  
235 summarizing the results from DE analysis in (A) for both pipelines; numbers are given only for genes encoding  
236 multiple transcripts. AS, alternative splicing; DE, differentially expressed; DET, differentially expressed transcript;  
237 incl., including; ref., reference; TPM, transcripts per million.

238  
239

## 240 **The alternative splicing landscape in *S. sclerotiorum* during host colonization**

241 To document the effect of AS on *S. sclerotiorum* genes differentially expressed *in planta*, we  
242 performed AS events detection with SUPPA2 on genes induced on each plant, and classified AS  
243 by type of event on each plant. The number of AS events varied 2.63-fold according to host,  
244 ranging from 158 AS events in *A. thaliana* to 415 AS events in *B. vulgaris*, reaching a total 1,086  
245 distinct AS events for the six plant species (**Figure 3A**). The distribution of AS event type did not  
246 differ significantly during colonization of the six different host plants (**Figure 3A**). Retained  
247 intron was the major type of AS event detected in *S. sclerotiorum* during host colonization (RI;  
248 39.8±1.1%), followed by alternative 3' receiver site (A3; 30.3±1.2%), alternative 5' donor site  
249 (A5; 15.0±0.6%), skipped exon (SE; 4.4±1.3%) and alternative first exon (AF; 1.1±0.2%).

250 In all hosts, the most frequent AS event was intron retention, of which the gene  
251 *Sscl15g105800* is one example. This gene belongs to the full set of AS gene candidates and  
252 encodes a 2,043 amino-acids long predicted protein of unknown function conserved in *B.*  
253 *cinerea*. StringTie identified for this gene a transcript TCONS\_00005227 with five exons and four  
254 introns (**Figure 3B**). The reference transcript TCONS\_00005230 harbors four exons, including a  
255 3,958 bp exon 2 corresponding to the fusion between TCONS\_0005227 exon 2, retained intron  
256 2 (351 bp), and exon 3. Reads aligned to TCONS\_0005227 intron 2 were detected in all RNA-seq  
257 samples, and were particularly abundant during infection of *A. thaliana*, *B. vulgaris* and  
258 *P. vulgaris*. *Sscl15g105800* was weakly expressed on *R. communis* with few reads aligned to  
259 TCONS\_0005227 intron 2 (**Figure 3B**). To confirm alternative splicing of TCONS\_0005227 intron  
260 2, we performed RT-PCR with primers spanning this intron on genomic DNA and on cDNAs  
261 produced from *S. sclerotiorum* grown *in vitro* (PDA medium) and infected plants (**Figure 3C**).  
262 Amplicons from the reference transcript TCONS\_00005230 were detected on all cDNAs, albeit



263 only weakly on cDNAs produced from infected *R. communis*. An alternative transcript was  
 264 detected on all cDNAs the size of which corresponds to TCONS\_00005227 retained intron 2.  
 265

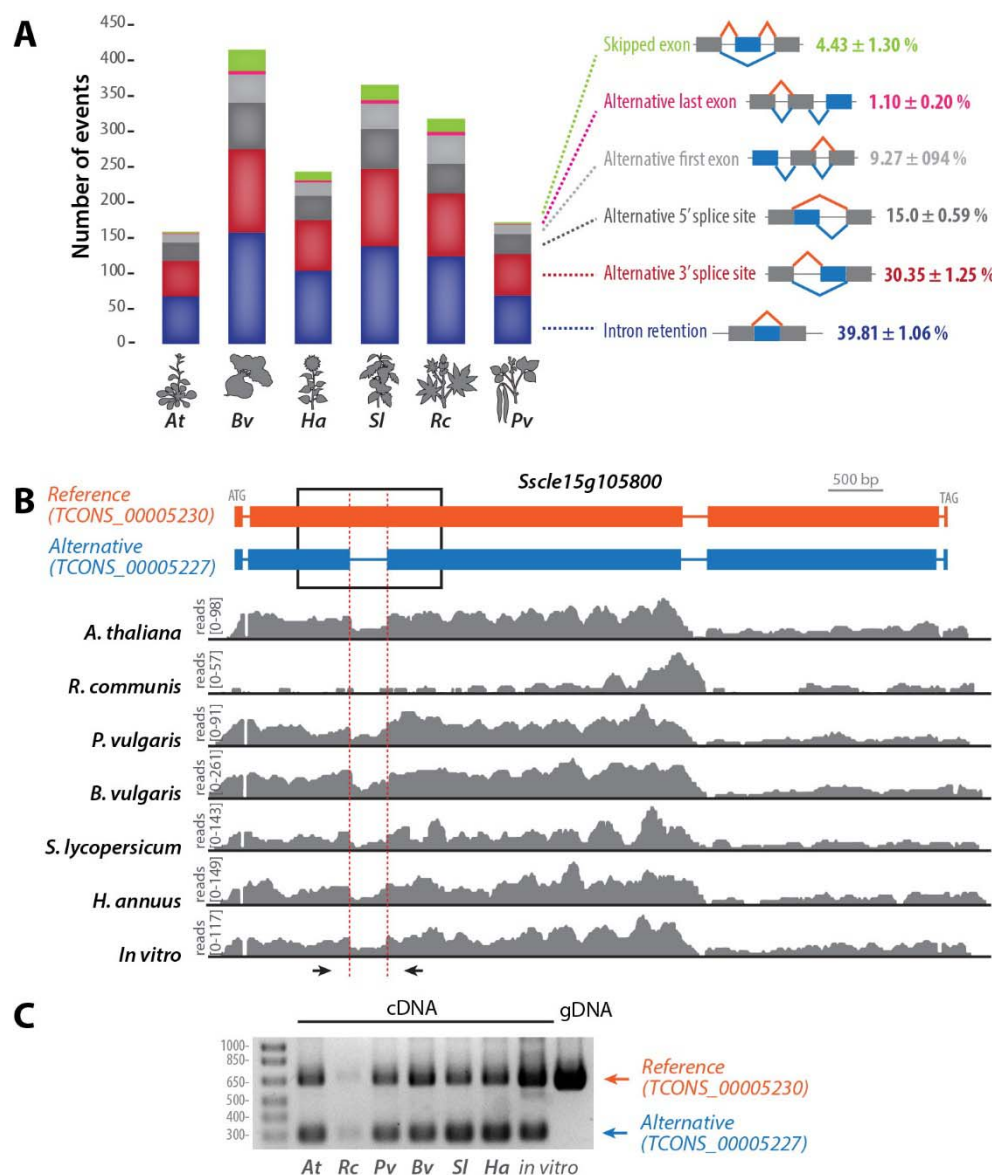

266  
 267  
 268 **Figure 3. Intron retention is the major type of alternative splicing (AS) event in *S. sclerotiorum* during the**  
 269 **colonization of plants from diverse botanical families. (A) Distribution of high confidence AS events identified by**  
 270 **SUPPA2 according to type of event and host plant infected by *S. sclerotiorum*. In diagrams depicting the different**  
 271 **type of events, orange lines show intron splicing pattern in the reference transcript, blue lines show intron splicing**  
 272 **pattern in the alternative transcript, blue boxes show alternatively spliced exons, gray boxes show invariant exons.**  
 273 **Percentages indicate the relative proportion of one AS event type relative to all AS events identified during**



274 infection of a given plant species. **(B)** Example of an intron retention event in the reference transcript of  
275 *Sscl15g105800*. In the transcripts diagram, exons are shown as boxes, introns as lines. Read mappings are shown  
276 in grey for one RNA-seq sample of each treatment. **(C)** RT-PCR analysis of *Sscl15g105800* transcripts produced  
277 during the colonization of six plant species and *in vitro*. The position of oligonucleotide primers used for RT-PCR is  
278 shown as arrows in (B). *At*, *Arabidopsis thaliana*; *Bv*, *Beta vulgaris*; *Ha*, *Helianthus annuus*; *Pv*, *Phaseolus vulgaris*;  
279 *Rc*, *Ricinus communis*; *Sl*, *Solanum lycopersicum*.

280

### 281 **Alternative splicing is host-regulated in *S. sclerotiorum***

282 To document the extent to which host plant species associated with alternative splicing events  
283 in *S. sclerotiorum*, we performed hierarchical clustering and principal component analysis (PCA)  
284 for *S. sclerotiorum* alternatively spliced transcript accumulation in six host species (**Figure 4A**).  
285 The distribution of the plant variable according to the two principal components displayed host-  
286 specific clustering, in which AS transcripts produced on each host could be clearly separated,  
287 except for AS transcripts produced on *A. thaliana* and *S. lycopersicum*. This analysis suggested  
288 that the relative accumulation of alternative transcripts produced by a given gene could vary  
289 according to the host being colonized.

290 We tested whether this was the case for the gene *Sscl03g026100*, encoding a predicted  
291 phosphoenolpyruvate kinase-like protein. The *Sscl03g026100* locus harbored RNA-seq reads  
292 that aligned in the 3' region of intron 1, indicative of alternative 3' receiver sites in exon 2 of the  
293 reference transcripts (*TCONS\_00008522*, **Figure 4B**). This splicing event is predicted to cause an  
294 extension of the alternatively spliced exon in transcript variant *TCONS\_00008521*. Thanks to its  
295 N-terminal extension, the protein isoform *TCONS\_0008522* but not *TCONS\_00008521* is  
296 recognized as a member of the PIRSF034452 family (TIM-barrel signal transduction protein).  
297 According to Cuffdiff transcript quantification, the ratio between alternative and reference  
298 transcript varied from 0.32 in *A. thaliana* to 0.73 in *B. vulgaris* (**Figure 4C**). To confirm  
299 alternative splicing of *Sscl03g026100* transcript, we performed RT-PCR with primers spanning  
300 the variant exon 2 on RNAs collected from five host species (**Figure 4D**). We retrieved a 418 bp  
301 amplicon corresponding to the reference transcript (*TCONS\_00008522*), a 535 bp amplicon  
302 corresponding to the *TCONS\_00008521* alternative transcript, as well as a third ~750 bp  
303 amplicon. In agreement with the RNA-seq read coverage, bands corresponding to the

304 alternative transcript *TCONS\_0008521* were much weaker than bands corresponding to the  
 305 reference transcript *TCONS\_0008522* in *A. thaliana*, *H. annuus* and *in vitro*.  
 306

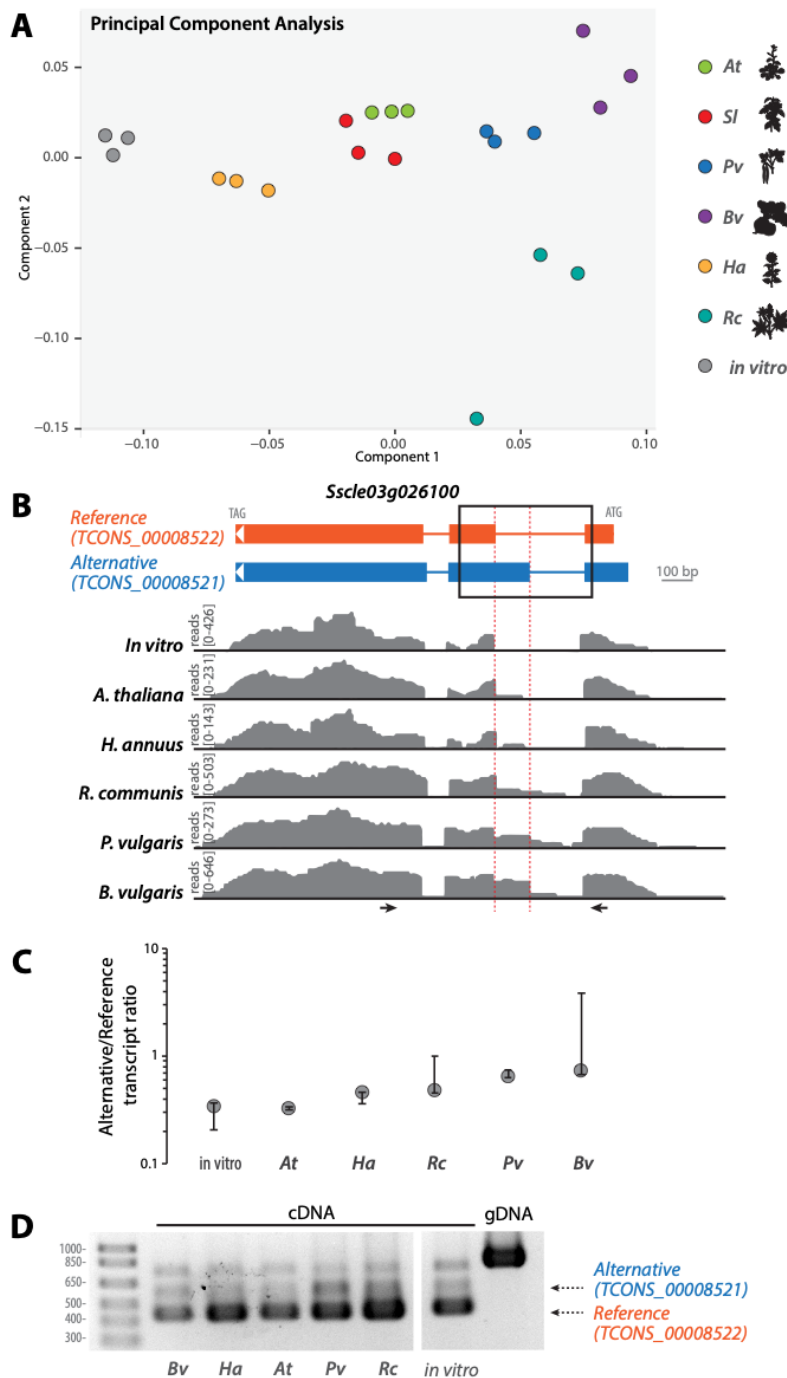

307  
 308 **Figure 4. Alternative 3' receiver splice site variation according to host in *Sscl03g026100*.** (A) Principal  
 309 component analysis map of the sample variable for the accumulation of reference and alternative transcripts

310 produced by 250 high confidence *S. sclerotiorum* genes showing alternative splicing. Sample types are color-coded  
311 according to infected host plant species. **(B)** Example of alternative 3' receiver splice site in the reference transcript  
312 of *Sscl03g026100*. In the transcript diagrams, exons are shown as boxes, introns as lines. Read mappings are  
313 shown in grey for one RNA-seq sample of each treatment. **(C)** Ratio between the abundance of alternative over  
314 reference transcript for *Sscl03g026100* determined by Cuffdiff. Error bars show 90% confidence interval. **(D)** RT-  
315 PCR analysis of *Sscl03g026100* transcripts produced during the colonization of five plant species and *in vitro*. The  
316 position of oligonucleotide primers used for RT-PCR is shown as arrows in (B). *At*, *Arabidopsis thaliana*; *Bv*, *Beta*  
317 *vulgaris*; *Ha*, *Helianthus annuus*; *Pv*, *Phaseolus vulgaris*; *Rc*, *Ricinus communis*; *Sl*, *Solanum lycopersicum*.

318

### 319 **Alternative splicing is predicted to generate protein isoforms with modified functions**

320 To study the functional consequences of AS in *S. sclerotiorum*, we first analyzed gene ontology  
321 (GO) terms enriched in our list of high confidence DE genes with AS. GO enrichment was  
322 determined using BiNGO, a tool package within the complex network visualizing platform  
323 “Cytoscape” (Shannon *et al.*, 2003; Maere *et al.*, 2005) (**Supplementary Table 5**). The most  
324 significantly enriched terms included “oxidoreductase activity” and “carbohydrate metabolic  
325 process”, suggesting that genes involved in the degradation of carbohydrates and organic  
326 molecules were subject to alternative splicing during infection of host plants. According to  
327 BLASTP searches (E value <1E-25) 175 of the 250 genes in our common set of AS candidates are  
328 conserved in related *Ascomycetes*, including *Botrytis* species (**Supplementary Table 6**).

329 Second, to test if AS could alter the domain content of protein isoforms in our full set of AS  
330 candidates, we assigned PFAM domains to all isoforms and identified AS events leading to a  
331 change in PFAM domain content. In total, 158 genes expressed alternative transcripts with  
332 changes in PFAM annotation profiles. Of these, 53 isoforms exhibited loss of PFAM domains, 85  
333 isoforms displayed gain of PFAM domains, and 20 isoforms show more complex changes of  
334 PFAM profiles (**Supplementary File 1**). Only 8 of the 158 genes with alterations in their PFAM  
335 annotation profiles were from the 250 common AS genes (**Table 1**). Four isoforms gained PFAM  
336 domains, e.g. the putative cutinase *Sscl11g080920* where the alternative isoform  
337 TCONS\_00002255 gained two PFAM domains, ETS\_PEA3\_N (PF04621.12) and CBM\_1  
338 (PF00734.17).

339 Furthermore, we explored the isoforms from alternatively spliced genes for signal peptides for  
340 secretion (**Figure 5A**). Of the 250 genes in our common set of AS candidates, 42 are predicted

341 to encode a secreted protein, corresponding to 4% of the *S. sclerotiorum* secretome (Juan et al.,  
342 2019; **Supplementary Figure 2**). Among those, five genes (*Sscl02g014060*, *Sscl07g057820*,  
343 *Sscl09g070580*, *Sscl12g091110*, and *Sscl15g103140*) showed possible gains of secretion  
344 peptide by AS and two cases of loss of secretion peptides in alternative isoforms  
345 (*Sscl10g075480* and *Sscl15g102380*). In the set of 3,393 AS candidates detected in total, we  
346 found 26 possible gains of secretion peptides and 16 losses of secretion peptides in alternative  
347 isoforms.

348 Similarly, alternative splicing caused the gain and loss of transmembrane domains in novel  
349 isoforms. In total, 20 novel isoforms exhibited gain of one and 25 isoforms gained more than  
350 one predicted transmembrane domains. 32 of these did not harbor a putative transmembrane  
351 domain in the reference isoform, which suggests re-localization to the plasma membrane or an  
352 intracellular membrane. *Vice versa*, we observed the loss of one transmembrane domain in 30  
353 isoforms and of more than one in 24 isoforms, including 32 isoforms that lost all  
354 transmembrane domains, suggesting subcellular re-localization of the respective novel isoform.  
355 Two genes who gained (*Sscl05g040780* and *Sscl16g109930*) and five genes that lost  
356 (*Sscl02g014060*, *Sscl02g019060*, *Sscl03g031900*, *Sscl05g043820*, *Sscl08g066940*)  
357 transmembrane domains are found in the 250 alternatively spliced and differentially expressed  
358 genes. Intriguingly, the novel isoform of *Sscl02g014060* is predicted to be secreted as well as  
359 to have lost its transmembrane domain.

360

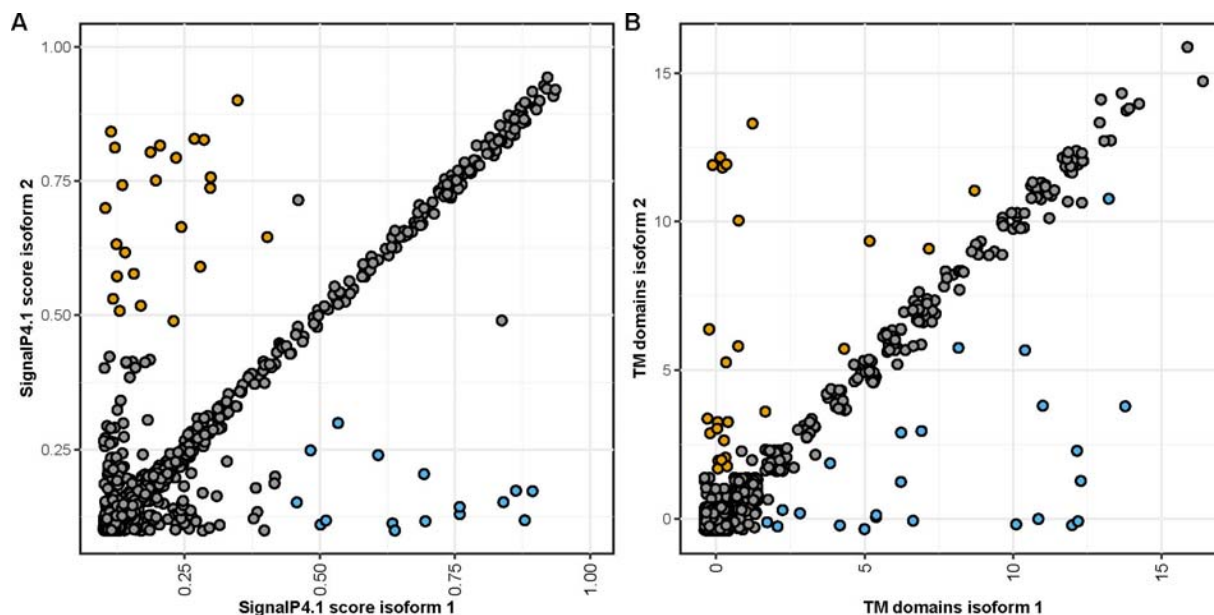

361  
 362 **Figure 5. Alternative splicing modifies secretion potential of proteins in *S. sclerotiorum*.** (A) We determined the  
 363 likelihood of presence of an N-terminal secretion signal using SignalP4.1 in the protein encoded by the reference  
 364 transcript (isoform 1) and the alternative transcripts (isoform 2). The scatterplot shows the SignalP scores of both  
 365 isoforms for all alternatively spliced genes of *S. sclerotiorum*, where a score of 0.45 is the threshold for a putative  
 366 secretion peptide. Orange data points indicate novel isoforms that may have gained a secretion peptide, blue data  
 367 points indicate loss of the secretion peptide. (B) We predicted the number of transmembrane domains for  
 368 reference (isoform 1) and novel isoforms (isoform 2) using TMHMM. Orange data points indicate isoforms that  
 369 gained transmembrane domains, blue data points indicate novel isoforms that may have lost one or more  
 370 transmembrane domains.

371

372

373 **Table 1: Changes in PFAM profiles of differentially expressed and alternatively spliced genes of *S. sclerotiorum*.**

| Gene                 | Isoform        | PFAM accessions           | PFAM descriptors               |
|----------------------|----------------|---------------------------|--------------------------------|
| <b>Sscl02g012330</b> | TCONS_00006935 | PF05277                   | DUF726                         |
|                      | TCONS_00006936 | PF04900; PF05277          | Fcf1; DUF726                   |
|                      | TCONS_00006937 | PF04900; PF09388          | Fcf1; SpoOE-like               |
| <b>Sscl03g026280</b> | TCONS_00008535 | PF00172; PF05393; PF07690 | Zn_clus; Hum_adeno_E3A; MFS_1; |
|                      |                | PF08006; PF14960          | DUF1700; ATP_synth_reg         |

|                      |                |                                                         |                                                                                    |
|----------------------|----------------|---------------------------------------------------------|------------------------------------------------------------------------------------|
|                      | TCONS_00008536 | PF00172; PF05393; PF07690;<br>PF08006; PF14960; PF04082 | Zn_clus; Hum_adeno_E3A; MFS_1;<br>DUF1700; ATP_synth_reg; Fungal_trans             |
|                      | TCONS_00008537 | PF00172                                                 | Zn_clus                                                                            |
| <b>Sscl03g030170</b> | TCONS_00008807 | PF06999                                                 | Suc_Fer-like                                                                       |
|                      | TCONS_00008808 |                                                         |                                                                                    |
| <b>Sscl03g031900</b> | TCONS_00008259 | PF01601                                                 | Corona_S2                                                                          |
|                      | TCONS_00008260 |                                                         |                                                                                    |
| <b>Sscl05g043820</b> | TCONS_00010732 | PF06172                                                 | Cupin_5                                                                            |
|                      | TCONS_00010733 |                                                         |                                                                                    |
| <b>Sscl11g080920</b> | TCONS_00002254 | PF01083; PF08237                                        | Cutinase; PE-PPE                                                                   |
|                      | TCONS_00002255 | PF01083; PF08237; PF04621;<br>PF00734                   | Cutinase; PE-PPE; ETS_PEA3_N; CBM_1                                                |
| <b>Sscl15g103140</b> | TCONS_00005366 | PF00169; PF01442; PF11932                               | PH; Apolipoprotein; DUF3450                                                        |
|                      | TCONS_00005367 | PF00169; PF01442; PF11932;<br>PF05592; PF17389; PF17390 | PH; Apolipoprotein; DUF3450;<br>Bac_rhamnosid; Bac_rhamnosid6H;<br>Bac_rhamnosid_C |
|                      | TCONS_00005368 | PF00169; PF01442; PF11932                               | PH; Apolipoprotein; DUF3450                                                        |
| <b>Sscl16g109930</b> | TCONS_00006105 | PF00032; PF00083; PF03137;<br>PF07690; PF12670          | Cytochrom_B_C; Sugar_tr; OATP;<br>MFS_1; DUF3792                                   |
|                      | TCONS_00006106 | PF00032; PF00083; PF03137;<br>PF07690; PF12670; PF05977 | Cytochrom_B_C; Sugar_tr; OATP;<br>MFS_1; DUF3793; MFS_3                            |

374

375

376 **Alternative splicing is predicted to modify the activity of *S. sclerotiorum* secreted proteins**

377 Of the 250 genes with evidence for AS, 42 are predicted to encode a secreted protein,  
378 corresponding to 4% of the *S. sclerotiorum* secretome (Juan et al., 2019; **Supplementary Figure**  
379 **2**). For example, the alternatively spliced gene *Sscl11g080920* was predicted to encode for two  
380 secreted protein isoforms derived from the reference transcript TCONS\_00002255 and the  
381 alternative transcript TCONS\_00002254, exhibiting an alternative 5' donor splice site in exon 3  
382 (**Figure 6A**). The relative accumulation of these two isoforms varied according to the plant  
383 being colonized. The reference transcript was expressed more strongly than the alternative  
384 transcript in *S. sclerotiorum* infecting *A. thaliana* (**Figure 6B**). By contrast, we measured higher  
385 accumulation of the alternative than the reference transcript in *S. sclerotiorum* infecting  
386 *P. vulgaris*. To confirm alternative splicing of the *Sscl11g080920* transcript, we performed RT-  
387 PCR with primers spanning the variant exon 3 on RNA collected from *A. thaliana* and *P. vulgaris*  
388 (**Figure 6C**). As expected, this identified a 618 bp amplicon corresponding to the reference  
389 transcript and a 430 bp amplicon corresponding to the alternative transcript during the  
390 colonization of *A. thaliana* and *P. vulgaris*. In this assay, the alternative transcript accumulated  
391 more than the reference transcript during the infection of *P. vulgaris*, and to a lesser extent  
392 during the colonization of *A. thaliana*.

393 To gain insights into the functional consequence of AS in *Sscl11g080920*, we analyzed PFAM  
394 domains and performed structure modelling for the proteins encoded by the reference  
395 transcript TCONS\_00002255 and the alternative transcript TCONS\_00002254. The alternative  
396 transcript TCONS\_00002254 encoded a 235 amino acid protein featuring a secretion signal and  
397 a cutinase (PF01083) domain (**Figure 6D**). Homology modeling and fold recognition in I-TASSER  
398 identified the acetylxylan esterase AXEII from *Penicillium purpureogenum* (PDB identifier 1BS9)  
399 as the closest structural analog to TCONS\_00002254 (RMSD 0.31Å). AXEII is a close structural  
400 analog of *Fusarium solani* cutinase, an esterase that hydrolyzes cutin in the plant's cuticle  
401 (Ghosh *et al.*, 2001). The reference transcript TCONS\_00002255 encoded a 296 amino-acid  
402 protein featuring a secretion signal, a cutinase domain and a short fungal cellulose binding  
403 domain (PF00734) (**Figure 6E**). Its closest structural analog identified by I-TASSER was model  
404 1G66 of AXEII. The superimposition of TCONS\_00002254 and TCONS\_00002255 protein models  
405 revealed that the C-terminal extension in TCONS\_00002255 corresponds to a surface-exposed

406 unstructured loop reaching the neighborhood of the catalytic site cleft (**Figure 6E**). This  
407 additional exposed loop could modify protein-protein interactions in TCONS\_00002255 or  
408 modify access to its catalytic site. These results suggest that alternative splicing is a mechanism  
409 to generate functional diversity in the repertoire of proteins secreted by *S. sclerotiorum* during  
410 the colonization of host plants.  
411



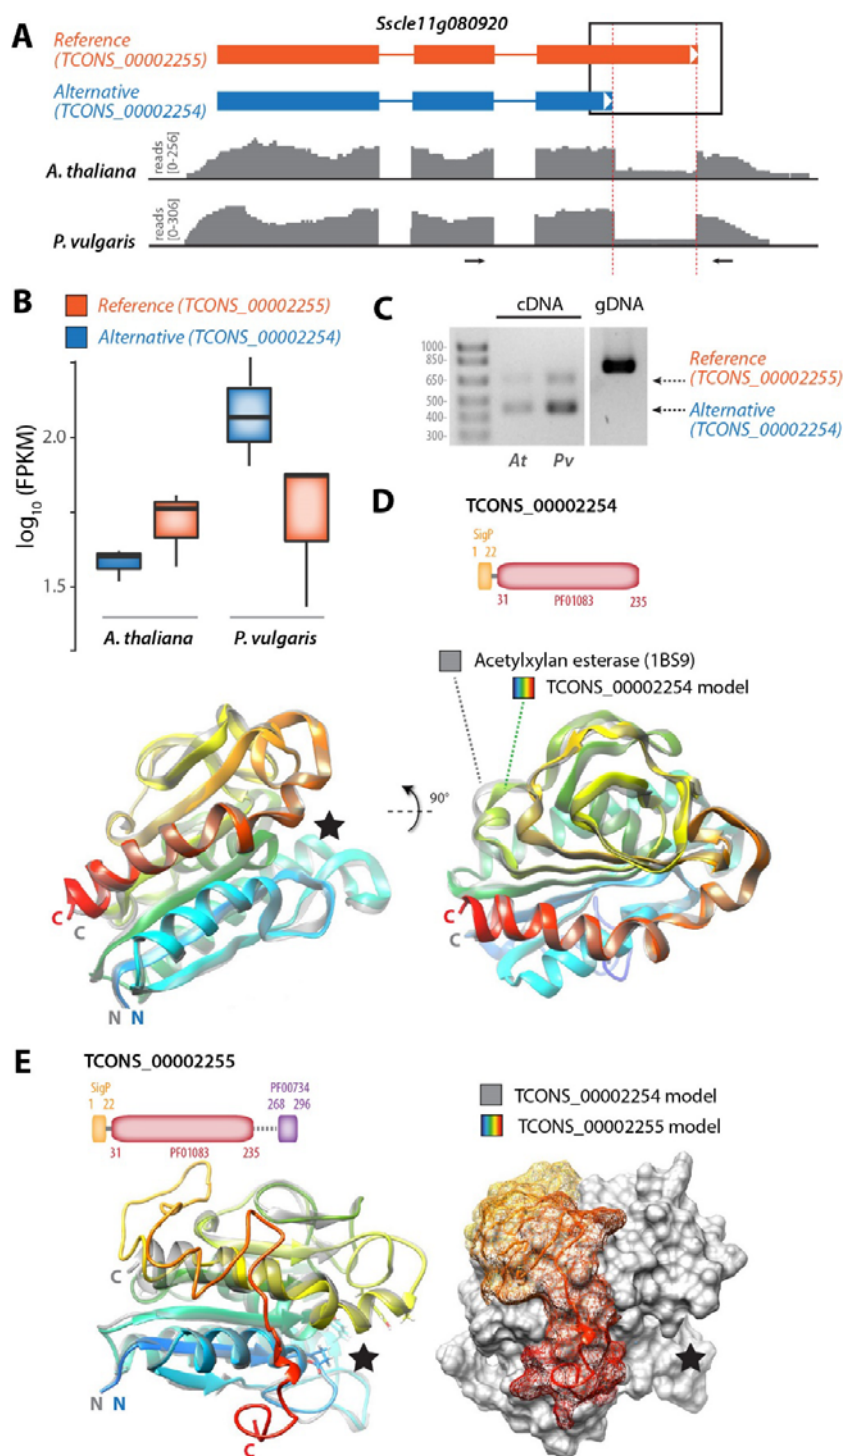

412

413 **Figure 6. Alternative splicing generates structural diversity in the predicted secreted protein Sscl11g080920.** (A)  
 414 Consequences of alternative 5' donor splice site in exon 3 of the reference transcript of *Sscl11g080920*. In the  
 415 transcript diagrams, exons are shown as boxes, introns as lines. Read mappings are shown in grey for one RNA-seq  
 416 sample collected on infected *A. thaliana* and infected *P. vulgaris*. (B) Relative accumulation of the reference and

417 alternative transcripts produced by *Sscl11g080920* on infected *A. thaliana* and infected *P. vulgaris*. Boxplots show  
418 the expression of the transcripts TCONS\_00002254 and TCONS00002255 from RNA-seq of *S. sclerotiorum* infecting  
419 *A. thaliana* and *P. vulgaris* in log<sub>10</sub>(FPKM). Boxplots show the median of the data points, whiskers are at 1.5x  
420 interquartile range of the highest/lowest value. **(C)** RT-PCR analysis of *Sscl11g080920* transcripts produced during  
421 the colonization of *A. thaliana* (*At*) and *P. vulgaris* (*Pv*). The position of oligonucleotide primers used for RT-PCR is  
422 shown as arrows in (A). **(D)** Diagram of the domain structure for the protein produced by TCONS\_00002254  
423 alternative transcript, and ribbon model of TCONS\_00002254 predicted protein structure (rainbow colors).  
424 TCONS\_00002254 protein model is shown superimposed with its closest structural analog AXEII acetylxylylan  
425 esterase (grey). The black star indicates the position of the active site in AXEII. **(E)** Diagram of the domain structure  
426 for the protein produced by TCONS\_00002255 reference transcript, and ribbon model of TCONS\_00002255  
427 predicted protein structure (rainbow colors). TCONS\_00002255 protein model is shown superimposed with  
428 TCONS\_00002254 model (grey). The black star indicates the position of the active site deduced from the analysis  
429 shown in (D).

430

431

432

## 433 **Discussion**

434 There are several approaches to study alternative splicing from RNA-seq data (Thakur *et al.*,  
435 2019), such as analyzing splice junctions (Hu *et al.*, 2013) or exonic regions (Anders *et al.*, 2012),  
436 which largely rely on mapping strategies only. The pipeline we used in this study combines two  
437 fundamentally different strategies (*de novo* assembly-based and reference mapping-based) to  
438 detect true novel splicing events and reduce algorithm bias. This approach however does not  
439 completely exclude false positive or false negative alternative splicing events, and also does not  
440 allow to distinguish between an alternative splicing event and correction of an incorrect  
441 reference gene model. Manual inspection or curation of gene models, as for example  
442 performed in *F. graminearum* (Zhao *et al.*, 2013), is required to distinguish between these  
443 possibilities. We have inspected AS predictions and experimentally validated alternative  
444 transcripts for a small subset of the AS events predicted here, supporting the accuracy of our  
445 analysis pipeline. Nevertheless, further efforts will be needed to improve the gene annotations  
446 of *S. sclerotiorum*, confirm alternative transcripts, and identify further alternatively spliced  
447 transcripts missed by our pipeline at the genome scale.

448

### 449 **A number of *S. sclerotiorum* genes are spliced alternatively on different hosts**

450 Colonization of a host plant by a pathogen requires global changes in gene expression of the  
451 pathogen and secretion of effector proteins and enzymes (van der Does & Rep, 2017).  
452 Alternative splicing is a regulatory mechanism affecting the activity of a majority of genes in  
453 plant and animal cells at the post-transcriptional level. Whether AS contributes to the  
454 regulation of virulence in plant-pathogenic fungi remains elusive. In this study, we present a  
455 comparative genome-wide survey of AS in the plant-pathogenic fungus *S. sclerotiorum* during  
456 the infection of six different host plants compared to growth *in vitro* as a control. Using  
457 stringent criteria for the detection of alternatively spliced isoforms, and considering genes  
458 identified consistently with our two pipelines, we found 250 genes that expressed more than  
459 one isoform (**Figure 2**). These represent about 2.3% of the genome, which is consistent with  
460 estimates for the AS rate in the closely related fungi species *Botrytis cinerea* (Grützmann *et al.*,  
461 2014). In *Fusarium graminearum*, alternative splicing represents 1.7% of the total number of

462 genes (Zhao *et al.*, 2013), while in *Colletotrichum graminicola* only 0.57% of the total number of  
463 the predicted genes appear to exhibit alternative splicing (Schliebner *et al.*, 2014). Yet, this  
464 percentage is strikingly low compared to the AS rate of the intron or multiexon-containing  
465 genes in plants such as *Arabidopsis thaliana* or mammals such as *Homo sapiens*, which are  
466 reported to be 42% and 95%, respectively (Pan *et al.*, 2008; Filichkin *et al.*, 2010). AS is not well  
467 characterized in plant-pathogenic fungi and needs to be investigated in more detail (Grützmann  
468 *et al.*, 2014). A previous study reported evidence for AS in the plant-pathogenic oomycete  
469 *Pseudoperonospora cubensis* that causes downy mildew in the *Cucurbitaceae* family (Burkhardt  
470 *et al.*, 2015). In this work, 24% of the expressed genes showed novel isoforms with new AS  
471 events over the course of infection of cucumber at 1-8 days after infection. Moreover, recently  
472 Jin *et al.* (2017) found that the transcripts of two different isolates of the plant fungal pathogen  
473 *Verticillium dahliae* undergo splicing of retained introns producing different isoforms of  
474 transcripts that differ between the two isolates during the fungal development. These isoforms  
475 have predicted roles in controlling many conserved biological functions, such as ATP synthesis  
476 and signal transduction.

477 In our analysis, most of the alternative splicing events were retained introns (RI; 39.8%), which  
478 is consistent with previous studies where intron retention showed higher preference in the  
479 newly identified isoforms (Grützmann *et al.*, 2014). On the other hand, skipped exons represent  
480 a small frequency in our analysis (4.4%) but could be considered higher than usual compared to  
481 other fungi such as *Verticillium dahliae* (2-fold higher; 2.2%). Interestingly, SE is the most  
482 common AS event in mammals (Sammeth *et al.*, 2008).

483

#### 484 **Do these AS variants contribute to virulence on the respective hosts?**

485 Alternative splicing is a natural phenomenon in eukaryotes that is genetically tightly regulated,  
486 and proper spliceosome activity ensures adequate splicing (Chen *et al.*, 2012). The operating  
487 mechanisms of splicing regulation and the extent to which components of the splicing  
488 machinery regulate splice site decisions remain poorly understood however (Saltzman *et al.*,  
489 2011). The spliceosome activity is modulated by *cis*- and *trans*-acting regulatory factors. The  
490 *trans*-acting elements include the SR (serine/arginine-rich) and hnRNP (heterogeneous

491 ribonucleoprotein) families (Chen & Manley, 2009; Nilsen & Graveley, 2010) and generally  
492 regulate AS by enhancing or inhibiting the assembly of the spliceosome at adjacent splice sites  
493 after perceiving *cis*-acting elements in exon or intron regions of pre-mRNAs.

494 Since spliceosome components strictly regulate splicing, any changes in spliceosome  
495 component abundance may result in inaccurate splicing and/or generation of alternative  
496 transcripts in accordance with the environmental condition that causes the changes. Although  
497 tightly regulated, AS is influenced by external stimuli in eukaryotes such as biotic and abiotic  
498 stresses. For instance, the LSM2–8 complex and SmE, which are regulatory components of the  
499 spliceosome, differentially modulate adaptation in response to abiotic stress conditions in  
500 *Arabidopsis* (Carrasco-López *et al.*, 2017; Huertas *et al.*, 2019). Similarly, U1A is essential in  
501 adapting *Arabidopsis* plants to salt stress. Mutation in AtU1A renders *Arabidopsis* plants  
502 hypersensitive to salt stress and results in ROS accumulation (Gu *et al.*, 2018).

503 In our analysis we found that many of the spliceosome components are down-regulated in *S.*  
504 *sclerotiorum* during infection, in particular on hosts where we detected a high number of AS  
505 events. For instance, during infection of *B. vulgaris* *S. sclerotiorum* exhibited the highest  
506 abundance of alternative transcripts and showed down-regulation of the majority of the  
507 spliceosome components (**Fig. 1** and **Fig. 3**). This suggests that AS in *S. sclerotiorum* could result  
508 from the down-regulation of spliceosome genes and raises the question of whether host plant  
509 defenses actively interfere with the regulation of *S. sclerotiorum* spliceosomal machinery to  
510 trigger the observed down-regulation. A related goal for future research will be determining  
511 whether alternative splicing confers fitness benefits to *S. sclerotiorum* during host colonization.  
512 Dedicated functional analyses will be required to clarify the role of AS in *S. sclerotiorum*  
513 adaptation to host.

514 In some cases, more than one isoform is present in a host plant. The reason could be that the  
515 new isoforms have new functions that assist the establishment of pathogenesis, while the  
516 dominant isoform(s) has/have substantial biological functions that are needed for  
517 *Sclerotinia* under any condition. The different isoforms produced by AS in *S. sclerotiorum* during  
518 infection of the different host plants could be a way to increase pathogen virulence. For  
519 instance, the alternatively spliced gene *Sscl03g026100* encodes a putative phosphonopyruvate

520 hydrolase. Phosphonopyruvate hydrolases hydrolyze phosphonopyruvate (P-pyr) into Pyruvate  
521 and Phosphate (Liu *et al.*, 2004). In plants, phosphonopyruvate plays an important intermediate  
522 role in the formation of organophosphonates, which function as antibiotics and play a role in  
523 pathogenesis or signaling. Therefore, the fungus may use these two different isoforms to  
524 detoxify one of the plant defense molecules in order to facilitate the infection process. In a  
525 previous study, *Ochrobactrum anthropi* and *Achromobacter* bacterial strains were found to  
526 degrade the organophosphates from surrounding environments and to use the degraded  
527 product as a source of carbon and nitrogen (Ermakova *et al.*, 2017). Interestingly, the newly  
528 identified isoform of Sscl03g026100 (TCONS\_00008521) showed the highest expression during  
529 infection of beans (*B. vulgaris*). Since *B. vulgaris* is well known for their production of antifungal  
530 secondary metabolites such as C-glycosyl flavonoids and betalains (Citores *et al.*, 2016; Ninfali  
531 *et al.*, 2017), this suggests that the new isoform may be required for *S. sclerotiorum* to  
532 overcome the plant resistance by degrading some of these metabolites. In addition, alternative  
533 splicing of Sscl11g080920, predicted to encode a secreted cutinase, could exhibit specificity for  
534 differently branched cellulose molecules. Taken together, our study revealed that *S.*  
535 *sclerotiorum* uses alternative splicing that gives rise to functionally divergent proteins. We  
536 further show that a number of these isoforms have differential expression on diverse host  
537 plants.

538

539

## 540 **Material and Methods**

541

### 542 **Plant inoculations and RNA sequencing**

543 Raw RNA-seq data used in this work is available from the NCBI Gene Expression Omnibus under  
544 accession numbers GSE106811, GSE116194 and GSE138039. Samples and RNAs were prepared  
545 as described in (Sucher *et al.*, 2020). Briefly, the edge of 25 mm-wide developed necrotic  
546 lesions were isolated with a scalpel blade and immediately frozen in liquid nitrogen. Samples  
547 were harvested before lesions reached 25 mm width, at 24 hours (*H. annuus*), 47 to 50 hours  
548 (*A. thaliana*, *P. vulgaris*, *R. communis* and *S. lycopersicum*) or 72 hours post inoculation (*B.*

549 *vulgaris*). Material obtained from leaves of three plants were pooled together for each sample,  
550 all samples were collected in triplicates. RNA extractions were performed using NucleoSpin RNA  
551 extraction kits (Macherey-Nagel, Düren, Germany) following the manufacturer's instructions.  
552 RNA sequencing was outsourced to Fasteris SA (Switzerland) to produce Illumina single end  
553 reads (*A. thaliana*, *S. lycopersicum*, *in vitro* control) or paired reads (other infected plants) using  
554 a HiSeq 2500 instrument.

555

#### 556 **Quantification of isoform and transcript abundance**

557 Quality control for the RNA-seq data was performed using FastQC (Babraham Bioinformatics).  
558 The quality-checked data were processed for trimming with the Java-based tool Trimmomatic-  
559 0.36 (Bolger et al., 2014). Transcript abundances were quantified using a set of tools as follows:  
560 In the alignment pipeline, reads were first mapped to the *S. sclerotiorum* reference genome  
561 (Derbyshire et al. 2017) using HISAT2 (Kim *et al.*, 2015). Annotation of reference genes and  
562 transcripts were provided in the input. The aligned reads were assembled and the transcripts  
563 were quantified in each sample using StringTie (Pertea *et al.*, 2015, 2016). The assemblies  
564 produced by StringTie were merged with the reference annotation file in one GTF file to  
565 incorporate the novel isoforms with the original ones using cuffmerge (Goff *et al.*, 2019). The  
566 accuracy of the merged assembly was estimated by reciprocal comparison to the *S.*  
567 *sclerotiorum* reference annotation. In the *de novo* assembly pipeline, transcript abundances  
568 were quantified using gffcompare (Pertea *et al.*, 2016) and cuffcompare (Trapnell *et al.*, 2012).  
569 All the expressed transcripts including novel genes and alternatively spliced transcripts were  
570 merged into one annotation file using the Tuxedo pipeline merging tool, cuffmerge. The  
571 accuracy of the assembled annotation file was assessed by comparing it to the reference  
572 genome using gffcompare (Pertea *et al.*, 2016).

573

#### 574 **Differential expression analysis of RNA-seq**

575 The differential expression analysis of genes and isoforms were calculated using cuffdiff from  
576 the Tuxedo pipeline (Trapnell *et al.*, 2012). We then used CummeRbund to visualize the cuffdiff  
577 results of the genes whose expression were marked as significant and at log<sub>2</sub> fold change of  $\pm 2$

578 across all samples, leaving 4,111 genes that had differentially expressed isoforms (**Figure 2**).  
579 *quasi-mapping* was applied on the same RNA-seq data for expression quantification of  
580 transcripts using Kallisto (Bray *et al.*, 2016) and Salmon-0.7.0 (Patro *et al.*, 2017). Differential  
581 expression analysis of the quantified transcript and isoform abundance of the RNA-seq data  
582 resulting from StringTie and Salmon, were used in cuffdiff (Trapnell *et al.*, 2012) and SUPPA2  
583 (Trincado *et al.*, 2018), respectively, according to the default parameters as referred to by the  
584 software manuals. The R Studio software packages CummeRbund (Goff *et al.*, 2019) was  
585 employed to determine the significant change in the transcript abundance across the different  
586 samples. All samples were compared with the PDA *in vitro* cultivation control. Default settings  
587 were used. Genes with an FDR-adjusted  $P$  ( $q$ ) < 0.05 with a fold change of  $\pm 2$  were considered  
588 differentially expressed.

589

#### 590 **RNA-seq data visualization and transcripts annotation**

591 The Integrative Genomics Viewer (IGV) (Robinson *et al.*, 2017) and Web Apollo annotator (Lee  
592 *et al.*, 2013) were used for visualizing the RNA-seq data. Heatmaps were generated with the  
593 heatmap.2 function of R (R Core Team 2018). Spliceosome genes were identified using several  
594 approaches. A first set of genes were identified based on map 03040 (Spliceosome) for *S.*  
595 *sclerotiorum* (organism code 'ssl') in the Kyoto Encyclopedia of Genes and Genomes (KEGG).  
596 The annotation of these genes was verified using BLASTP searches against *Saccharomyces*  
597 *cerevisiae* and *Homo sapiens* in the NCBI ReSeq database followed by searches in the UniprotKB  
598 database for detailed annotation. Second, we searched for all spliceosome components  
599 annotated in Ascomycete genomes in the UniprotKB database and identified their orthologs in  
600 *S. sclerotiorum* using BLASTP searches. Gene ontology classification database with the Blast2GO  
601 package was used to perform the functional clustering of the differentially expressed or spliced  
602 genes. The method was performed using Fisher's exact test with robust false discovery rate  
603 (FDR) correction to obtain an adjusted  $P$ -value between certain tested gene groups and the  
604 whole annotation. SignalP4.1 (Nielsen, 2017) was used to predict N-terminal secretion signals  
605 of reference and novel isoforms. Transmembrane domains were predicted with TMHMM v2.0  
606 (Krogh *et al.*, 2001).



607

### 608 **Reverse transcription PCR**

609 RNAs were collected as for the RNAseq experiment. Reverse transcription was performed using  
610 0.5  $\mu$ L of SuperScriptII reverse transcriptase (Invitrogen), 1  $\mu$ g of oligo(dT), 10 nmol of dNTP and  
611 1  $\mu$ g of total RNA in a 20  $\mu$ L reaction. RNAs collected from 3 plants of each species were pooled  
612 together for cDNA synthesis. RT-PCR was performed using gene-specific primers  
613 (**Supplementary Table 7**) on an Eppendorf G-storm GS2 mastercycler with PCR conditions 4 min  
614 at 94°C followed by 32 cycles of 30 s at 94°C, 30 s at 55°C and 1 min at 72°C, followed by 10 min  
615 at 72°C.

616

### 617 **Protein 3D structure modeling and visualization**

618 Protein structure models were determined using the I-TASSER online server (Yang *et al.*, 2015).  
619 Top protein models retrieved from I-TASSER searches were rendered using the UCSF Chimera  
620 1.11.2 software. Models were superimposed using the MatchMaker function in Chimera, best-  
621 aligning pair of chains with the Needleman-Wunsch algorithm with BLOSUM-62 matrix and  
622 iterating by pruning atom pairs until no pair exceeds 2.0 angstrom.

623

624 **Conflict of Interest**

625 The authors declare that the research was conducted in the absence of any commercial or  
626 financial relationships that could be construed as a potential conflict of interest.

627

628 **Author contributions**

629 HMMI suggested the idea, designed the experiment, performed the bioinformatics analyses,  
630 and drafted the manuscript. SK contributed to the bioinformatics analyses and drafted the  
631 manuscript. MD performed the RT-PCR. SR monitored the RT-PCR experiment, contributed to  
632 bioinformatics analyses, revised the manuscript and provided feedback. All authors edited and  
633 proofread and approved the final version of this manuscript.

634

635 **Funding**

636 This work was supported by a Starting grant from the European Research Council (ERC-StG-  
637 336808) to SR and the French Laboratory of Excellence project TULIP (ANR-10-LABX-41; ANR-  
638 11-IDEX-0002-02).

639

640 **Acknowledgements**

641 This work is dedicated to the memory of Mohammed M. I. Al-Maraghy, who had recently  
642 passed away. This work was supported by the French and the Egyptian governments through a  
643 co-financed fellowship by the French Embassy in Egypt (Institute Français d’Egypte; IFE) and the  
644 Science and Technology Development Fund (STDF). We are grateful to the genotoul  
645 bioinformatics platform Toulouse Midi-Pyrenees (Bioinfo Genotoul, <http://bioinfo.genotoul.fr/>)  
646 for providing help and/or computing and/or storage resources.

647

648 **Data availability statement**

649 All datasets generated for this study are included in the manuscript and the supplementary  
650 files. RNA-seq data is deposited at NCBI GEO under accessions GSE106811, GSE116194 and  
651 GSE138039.

652

653 **References**

654

655 **Alamancos GP, Pagès A, Trincado JL, Bellora N, Eyra E. 2015.** Leveraging transcript  
656 quantification for fast computation of alternative splicing profiles. *RNA* **21**: 1521–1531.

657 **Anders S, Reyes A, Huber W. 2012.** Detecting differential usage of exons from RNA-seq data.  
658 *Genome Research* **22**: 2008–2017.

659 **Badet T, Peyraud R, Mbengue M, Navaud O, Derbyshire M, Oliver RP, Barbacci A, Raffaele S.**  
660 **2017.** Codon optimization underpins generalist parasitism in fungi. *eLife* **6**: e22472.

661 **Blanco FJ, Bernabeu C. 2011.** Alternative splicing factor or splicing factor-2 plays a key role in  
662 intron retention of the endoglin gene during endothelial senescence. *Aging Cell* **10**: 896–907.

663 **Boland GJ, Hall R. 1994.** Index of plant hosts of *Sclerotinia sclerotiorum*. *Canadian Journal of*  
664 *Plant Pathology* **16**: 93–108.

665 **Braunschweig U, Barbosa-Morais NL, Pan Q, Nachman EN, Alipanahi B, Gonatopoulos-**  
666 **Pournatzis T, Frey B, Irimia M, Blencowe BJ. 2014.** Widespread intron retention in mammals  
667 functionally tunes transcriptomes. *Genome Research* **24**: 1774–1786.

668 **Bray NL, Pimentel H, Melsted P, Pachter L. 2016.** Near-optimal probabilistic RNA-seq  
669 quantification. *Nature Biotechnology* **34**: 525–527.

670 **Burkhardt A, Buchanan A, Cumbie JS, Savory EA, Chang JH, Day B. 2015.** Alternative splicing in  
671 the obligate biotrophic oomycete pathogen *Pseudoperonospora cubensis*. *Molecular Plant-*  
672 *Microbe Interactions* **28**: 298–309.

673 **Carrasco-López C, Hernández-Verdeja T, Perea-Resa C, Abia D, Catalá R, Salinas J. 2017.**  
674 Environment-dependent regulation of spliceosome activity by the LSM2-8 complex in  
675 Arabidopsis. *Nucleic Acids Research* **45**: 7416–7431.

676 **Chen M, Manley JL. 2009.** Mechanisms of alternative splicing regulation: insights from  
677 molecular and genomics approaches. *Nature Reviews Molecular Cell Biology* **10**: 741–754.

678 **Chen L, Tovar-Corona JM, Urrutia AO. 2012.** Alternative splicing: A potential source of  
679 functional innovation in the eukaryotic genome. *International Journal of Evolutionary Biology*  
680 **2012**: 596274.

681 **Citores L, Iglesias R, Gay C, Ferreras JM. 2016.** Antifungal activity of the ribosome-inactivating

- 682 protein BE27 from sugar beet (*Beta vulgaris* L.) against the green mould *Penicillium digitatum*.  
683 *Molecular Plant Pathology* **17**: 261–271.
- 684 **Cui P, Zhang S, Ding F, Ali S, Xiong L. 2014.** Dynamic regulation of genome-wide pre-mRNA  
685 splicing and stress tolerance by the Sm-like protein LSM5 in Arabidopsis. *Genome Biology* **15**: 1–  
686 18.
- 687 **Derbyshire M, Denton-Giles M, Hegedus D, Seifbarghi S, Rollins J, Kan J Van, Seidl MF, Faino L,**  
688 **Mbengue M, Navaud O, et al. 2017.** The complete genome sequence of the phytopathogenic  
689 fungus *Sclerotinia sclerotiorum* reveals insights into the genome architecture of broad host  
690 range pathogens. *Genome Biology and Evolution* **9**: 593–618.
- 691 **van der Does HC, Rep M. 2017.** Adaptation to the host environment by plant-pathogenic fungi.  
692 *Annual Review of Phytopathology* **55**: 427–450.
- 693 **Eckardt NA. 2013.** The Plant Cell Reviews Alternative Splicing. *The Plant Cell* **25**: 3639–3639.
- 694 **Ermakova IT, Shushkova T V., Sviridov A V., Zelenkova NF, Vinokurova NG, Baskunov BP,**  
695 **Leontievsky AA. 2017.** Organophosphonates utilization by soil strains of *Ochrobactrum anthropi*  
696 and *Achromobacter* sp. *Archives of Microbiology* **199**: 665–675.
- 697 **Filichkin SA, Priest HD, Givan SA, Shen R, Bryant DW, Fox SE, Wong W-K, Mockler TC. 2010.**  
698 Genome-wide mapping of alternative splicing in *Arabidopsis thaliana*. *Genome Research* **20**:  
699 45–58.
- 700 **Freitag J, Ast J, Bölker M. 2012.** Cryptic peroxisomal targeting via alternative splicing and stop  
701 codon read-through in fungi. *Nature* **485**: 522–525.
- 702 **Friesen TL, Faris JD, Solomon PS, Oliver RP. 2008.** Host-specific toxins: Effectors of necrotrophic  
703 pathogenicity. *Cellular Microbiology* **10**: 1421–1428.
- 704 **Ghosh D, Sawicki M, Lala P, Erman M, Pangborn W, Eyzaguirre J, Gutiérrez R, Jörnvall H, Thiel**  
705 **DJ. 2001.** Multiple conformations of catalytic serine and histidine in acetylxylan esterase at 0.90  
706 Å. *Journal of Biological Chemistry* **276**: 11159–11166.
- 707 **Goff LA, Trapnell C, Kelley D. 2019.** CummeRbund: Analysis, exploration, manipulation, and  
708 visualization of Cufflinks high-throughput sequencing data. : R package version 2.28.0.
- 709 **Grützmann K, Szafranski K, Pohl M, Voigt K, Petzold A, Schuster S, Grutzmann K, Szafranski K,**  
710 **Pohl M, Voigt K, et al. 2014.** Fungal alternative splicing is associated with multicellular

- 711 complexity and virulence: A genome-wide multi-species study. *DNA Research* **21**: 27–39.
- 712 **Gu J, Xia Z, Luo Y, Jiang X, Qian B, Xie H, Zhu J-K, Xiong L, Zhu J, Wang Z-Y. 2018.** Spliceosomal  
713 protein U1A is involved in alternative splicing and salt stress tolerance in *Arabidopsis thaliana*.  
714 *Nucleic Acids Research* **46**: 1777–1792.
- 715 **Hu Y, Huang Y, Du Y, Orellana CF, Singh D, Johnson AR, Monroy A, Kuan P-F, Hammond SM,**  
716 **Makowski L, et al. 2013.** DiffSplice: the genome-wide detection of differential splicing events  
717 with RNA-seq. *Nucleic Acids Research* **41**: e39–e39.
- 718 **Huertas R, Catalá R, Jiménez-Gómez JM, Mar Castellano M, Crevillén P, Piñeiro M, Jarillo JA,**  
719 **Salinas J. 2019.** Arabidopsis SME1 regulates plant development and response to abiotic stress  
720 by determining spliceosome activity specificity. *The Plant Cell* **31**: 537–554.
- 721 **Jin L, Li G, Yu D, Huang W, Cheng C, Liao S, Wu Q, Zhang Y. 2017.** Transcriptome analysis  
722 reveals the complexity of alternative splicing regulation in the fungus *Verticillium dahliae*. *BMC*  
723 *Genomics* **18**: 1–14.
- 724 **Juan J, Armenteros A, Tsirigos KD, Sønderby CK, Petersen TN, Winther O, Brunak S, Von**  
725 **Heijne G, Nielsen H. 2019.** SignalP 5.0 improves signal peptide predictions using deep neural  
726 networks. *Nature Biotechnology* **37**: 420–423.
- 727 **Kim D, Langmead B, Salzberg SL. 2015.** HISAT: a fast spliced aligner with low memory  
728 requirements. *Nature Methods* **12**: 357–360.
- 729 **Krogh A, Larsson B, von Heijne G, Sonnhammer ELL. 2001.** Predicting transmembrane protein  
730 topology with a hidden markov model: application to complete genomes. *Journal of Molecular*  
731 *Biology* **305**: 567–580.
- 732 **Lee E, Helt GA, Reese JT, Munoz-Torres MC, Childers CP, Buels RM, Stein L, Holmes IH, Elsik**  
733 **CG, Lewis SE. 2013.** Web Apollo: A web-based genomic annotation editing platform. *Genome*  
734 *Biology* **14**: R93.
- 735 **Liang X, Rollins JA. 2018.** Mechanisms of broad host range necrotrophic pathogenesis in  
736 *Sclerotinia sclerotiorum*. *Phytopathology* **108**: 1128–1140.
- 737 **Liu S, Lu Z, Han Y, Jia Y, Howard A, Dunaway-Mariano D, Herzberg O. 2004.** Conformational  
738 flexibility of PEP mutase. *Biochemistry* **43**: 4447–4453.
- 739 **Maere S, Heymans K, Kuiper M. 2005.** BiNGO: a Cytoscape plugin to assess overrepresentation

- 740 of Gene Ontology categories in biological networks. *Bioinformatics* **21**: 3448–3449.
- 741 **Martin JA, Wang Z. 2011.** Next-generation transcriptome assembly. *Nature Reviews Genetics*  
742 **12**: 671–682.
- 743 **McLoughlin AG, Wytinck N, Walker PL, Girard IJ, Rashid KY, de Kievit T, Fernando WGD,**  
744 **Whyard S, Belmonte MF. 2018.** Identification and application of exogenous dsRNA confers  
745 plant protection against *Sclerotinia sclerotiorum* and *Botrytis cinerea*. *Scientific Reports* **8**: 7320.
- 746 **Naito S, Sugimoto T. 1986.** *Sclerotinia* stalk rot of sugar beets. *Japanese Journal of*  
747 *Phytopathology* **52**: 217–224.
- 748 **Naro C, Jolly A, Di Persio S, Bielli P, Setterblad N, Alberdi AJ, Vicini E, Geremia R, De la Grange**  
749 **P, Sette C. 2017.** An orchestrated intron retention program in meiosis controls timely usage of  
750 transcripts during germ cell differentiation. *Developmental Cell* **41**: 82-93.e4.
- 751 **Nielsen H. 2017.** Predicting secretory proteins with SignalP. In: Protein Function Prediction. 59–  
752 73.
- 753 **Nilsen TW, Graveley BR. 2010.** Expansion of the eukaryotic proteome by alternative splicing.  
754 *Nature* **463**: 457–463.
- 755 **Ninfali P, Antonini E, Frati A, Scarpa ES. 2017.** C-glycosyl flavonoids from *Beta vulgaris cicla* and  
756 betalains from *Beta vulgaris rubra*: antioxidant, anticancer and antiinflammatory activities - A  
757 review. *Phytotherapy Research* **31**: 871–884.
- 758 **Pan Q, Shai O, Lee LJ, Frey BJ, Blencowe BJ. 2008.** Deep surveying of alternative splicing  
759 complexity in the human transcriptome by high-throughput sequencing. *Nature Genetics* **40**:  
760 1413–1415.
- 761 **Patro R, Duggal G, Love MI, Irizarry RA, Kingsford C. 2017.** Salmon provides fast and bias-aware  
762 quantification of transcript expression. *Nature Methods* **14**: 417–419.
- 763 **Peltier AJ, Bradley CA, Chilvers MI, Malvick DK, Mueller DS, Wise KA, Esker PD. 2012.** Biology,  
764 yield loss and control of *Sclerotinia* stem rot of soybean. *Journal of Integrated Pest*  
765 *Management* **3**: B1–B7.
- 766 **Pertea M, Kim D, Pertea GM, Leek JT, Salzberg SL. 2016.** Transcript-level expression analysis of  
767 RNA-seq experiments with HISAT, StringTie and Ballgown. *Nature Protocols* **11**: 1650–1667.
- 768 **Pertea M, Pertea GM, Antonescu CM, Chang T-C, Mendell JT, Salzberg SL. 2015.** StringTie

769 enables improved reconstruction of a transcriptome from RNA-seq reads. *Nature Biotechnology*  
770 **33**: 290–295.

771 **Peyraud R, Mbengue M, Barbacci A, Raffaele S. 2019.** Intercellular cooperation in a fungal  
772 plant pathogen facilitates host colonization. *Proceedings of the National Academy of Sciences of*  
773 *the United States of America* **116**: 3193–3201.

774 **Rigo R, Bazin J, Crespi M, Charon C. 2019.** Alternative splicing in the regulation of plant–  
775 microbe interactions. *Plant and Cell Physiology* **60**: 1906–1916.

776 **Robinson JT, Thorvaldsdóttir H, Wenger AM, Zehir A, Mesirov JP. 2017.** Variant review with  
777 the Integrative Genomics Viewer. *Cancer Research* **77**: e31–e34.

778 **Rodriguez-Moreno L, Ebert MK, Bolton MD, Thomma BPHJ. 2018.** Tools of the crook-infection  
779 strategies of fungal plant pathogens. *The Plant Journal* **93**: 664–674.

780 **Saltzman AL, Pan Q, Blencowe BJ. 2011.** Regulation of alternative splicing by the core  
781 spliceosomal machinery. *Genes & Development* **25**: 373–384.

782 **Sammeth M, Foissac S, Guigó R. 2008.** A general definition and nomenclature for alternative  
783 splicing events. *PLoS Computational Biology* **4**: e1000147.

784 **Schliebner I, Becher R, Hempel M, Deising HB, Horbach R. 2014.** New gene models and  
785 alternative splicing in the maize pathogen *Colletotrichum graminicola* revealed by RNA-Seq  
786 analysis. *BMC Genomics* **15**: 842.

787 **Schmitz U, Pinello N, Jia F, Alasmari S, Ritchie W, Keightley MC, Shini S, Lieschke GJ, Wong JLL,**  
788 **Rasko JEJ. 2017.** Intron retention enhances gene regulatory complexity in vertebrates. *Genome*  
789 *Biology* **18**: 216.

790 **Shannon P, Markiel A, Ozier O, Baliga NS, Wang JT, Ramage D, Amin N, Schwikowski B, Ideker**  
791 **T. 2003.** Cytoscape: A software environment for integrated models of biomolecular interaction  
792 networks. *Genome Research* **13**: 2498–2504.

793 **Sucher J, Mbengue M, Dresen A, Barascud M, Didelon M, Barbacci A, Raffaele S. 2020.**  
794 Phylotranscriptomics of the Pentapetalae reveals frequent regulatory variation in plant local  
795 responses to the fungal pathogen *Sclerotinia sclerotiorum*. *The Plant Cell*: tpc.00806.2019.

796 **Team RC. 2018.** R: A Language and Environment for Statistical Computing. *Open Journal of*  
797 *Statistics* **04**: 687–701.

798 **Thakur PK, Rawal HC, Obuca M, Kaushik S. 2019.** Bioinformatics approaches for studying  
799 alternative splicing. *Encyclopedia of Bioinformatics and Computational Biology* **2**: 221–234.

800 **Trapnell C, Roberts A, Goff L, Pertea G, Kim D, Kelley DR, Pimentel H, Salzberg SL, Rinn JL,**  
801 **Pachter L. 2012.** Differential gene and transcript expression analysis of RNA-seq experiments  
802 with TopHat and Cufflinks. *Nature Protocols* **7**: 562–578.

803 **Trapnell C, Williams BA, Pertea G, Mortazavi A, Kwan G, Van Baren MJ, Salzberg SL, Wold BJ,**  
804 **Pachter L. 2010.** Transcript assembly and abundance estimation from RNA-Seq reveals  
805 thousands of new transcripts and switching among isoforms. *Nature Biotechnology* **28**: 511–  
806 515.

807 **Trincado JL, Entizne JC, Hysenaj G, Singh B, Skalic M, Elliott DJ, Eyraas E. 2018.** SUPPA2: fast,  
808 accurate, and uncertainty-aware differential splicing analysis across multiple conditions.  
809 *Genome Biology* **19**: 40.

810 **Wang ET, Sandberg R, Luo S, Khrebtkova I, Zhang L, Mayr C, Kingsmore SF, Schroth GP, Burge**  
811 **CB. 2008.** Alternative isoform regulation in human tissue transcriptomes. *Nature* **456**: 470–476.

812 **Xiong D, Wang Y, Ma J, Klosterman SJ, Xiao S, Tian C. 2014.** Deep mRNA sequencing reveals  
813 stage-specific transcriptome alterations during microsclerotia development in the smoke tree  
814 vascular wilt pathogen, *Verticillium dahliae*. *BMC Genomics* **15**: 324.

815 **Yang J, Yan R, Roy A, Xu D, Poisson J, Zhang Y. 2015.** The I-TASSER Suite: protein structure and  
816 function prediction. *Nature Methods* **12**: 7–8.

817 **Zhang X-N, Shi Y, Powers JJ, Gowda NB, Zhang C, Ibrahim HMM, Ball HB, Chen SL, Lu H, Mount**  
818 **SM. 2017.** Transcriptome analyses reveal SR45 to be a neutral splicing regulator and a  
819 suppressor of innate immunity in *Arabidopsis thaliana*. *BMC Genomics* **18**: 772.

820 **Zhao C, Waalwijk C, de Wit PJGM, Tang D, van der Lee T. 2013.** RNA-Seq analysis reveals new  
821 gene models and alternative splicing in the fungal pathogen *Fusarium graminearum*. *BMC*  
822 *Genomics* **14**: 21.

823



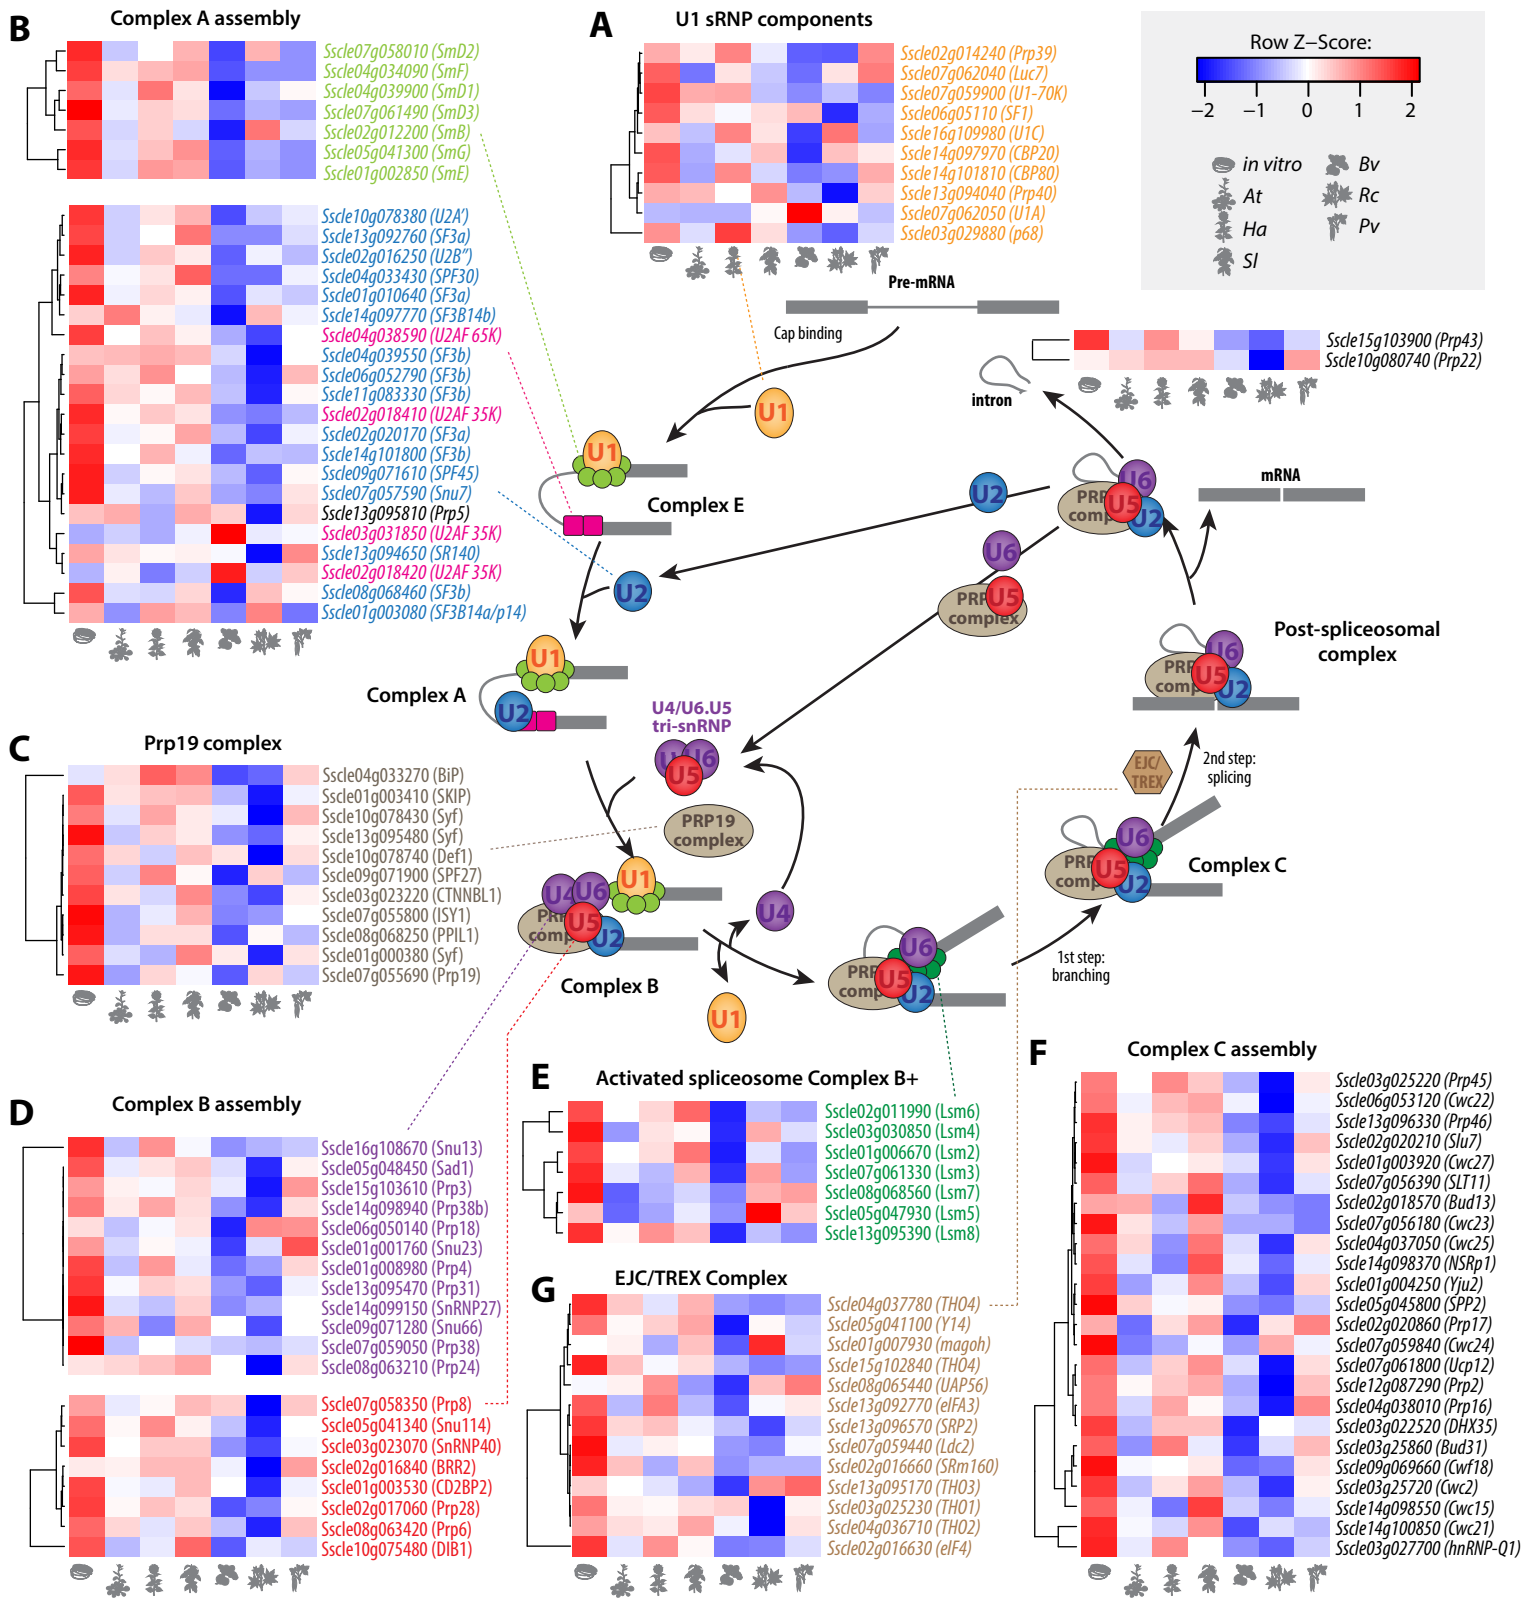

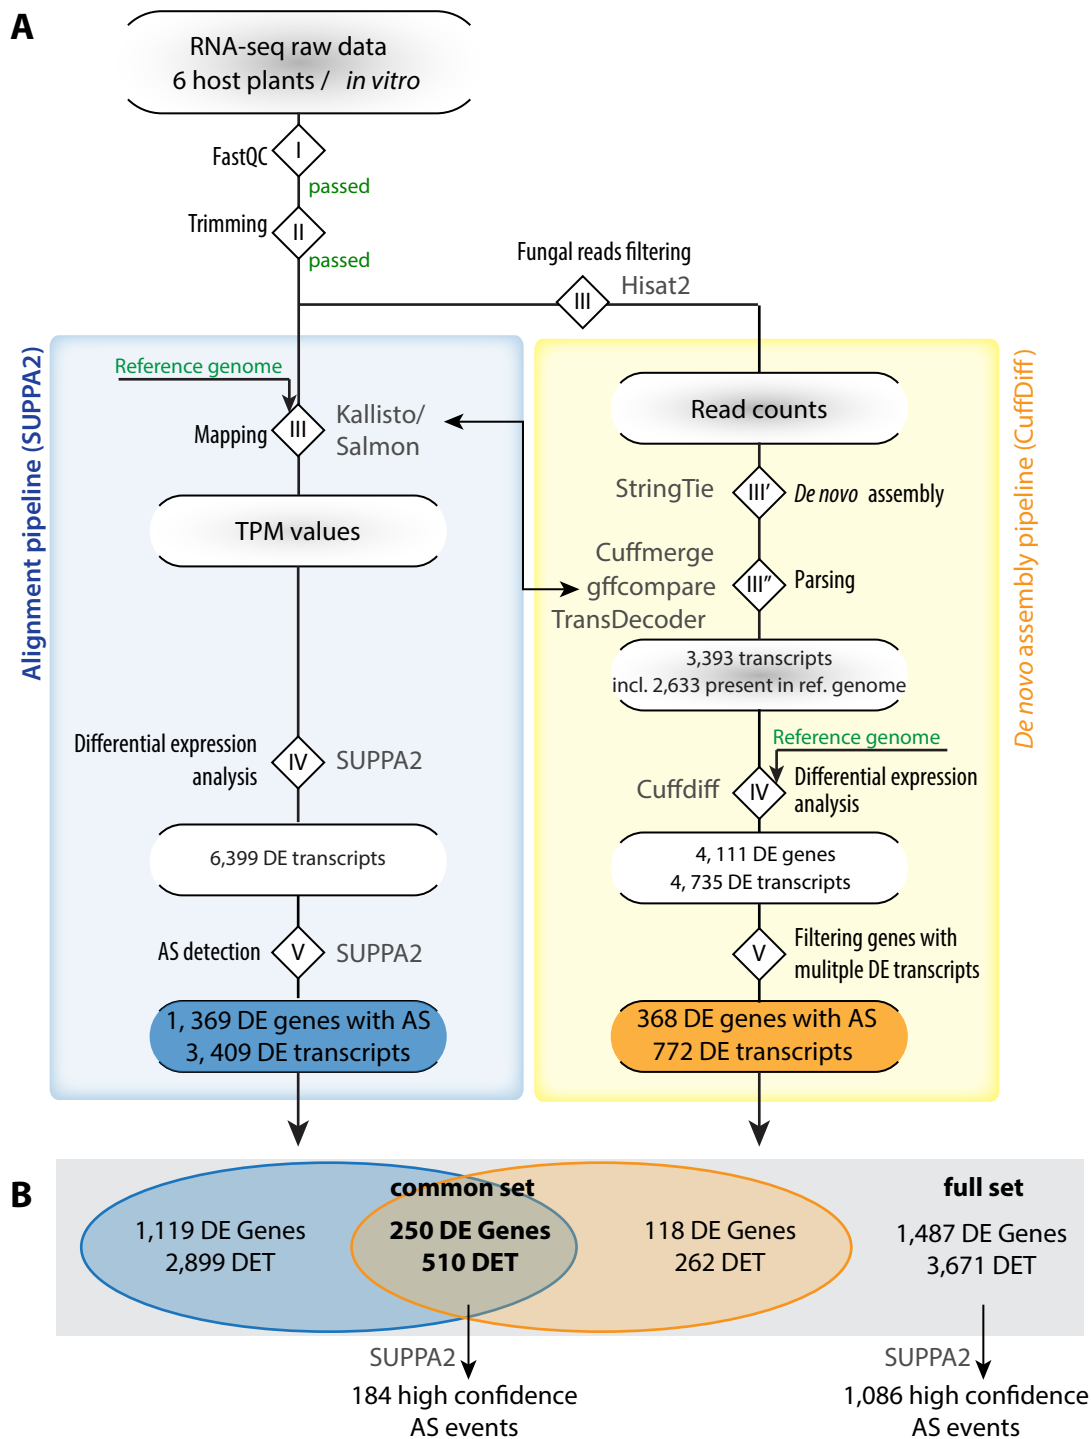

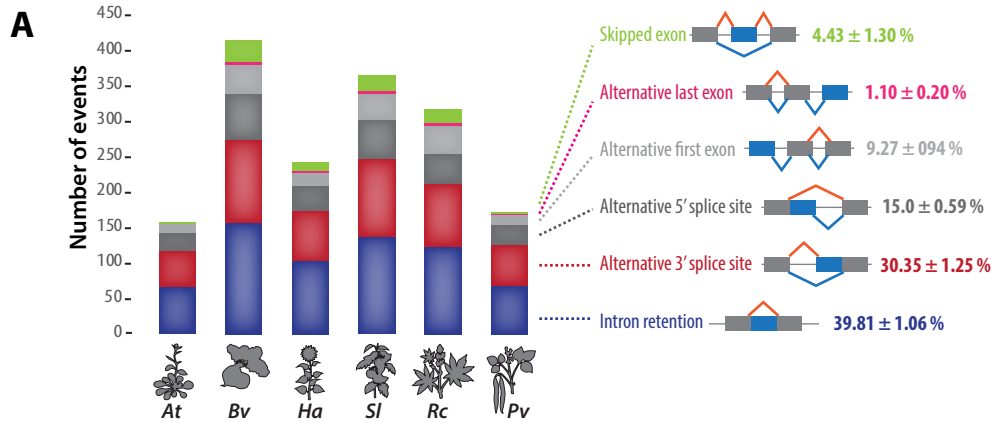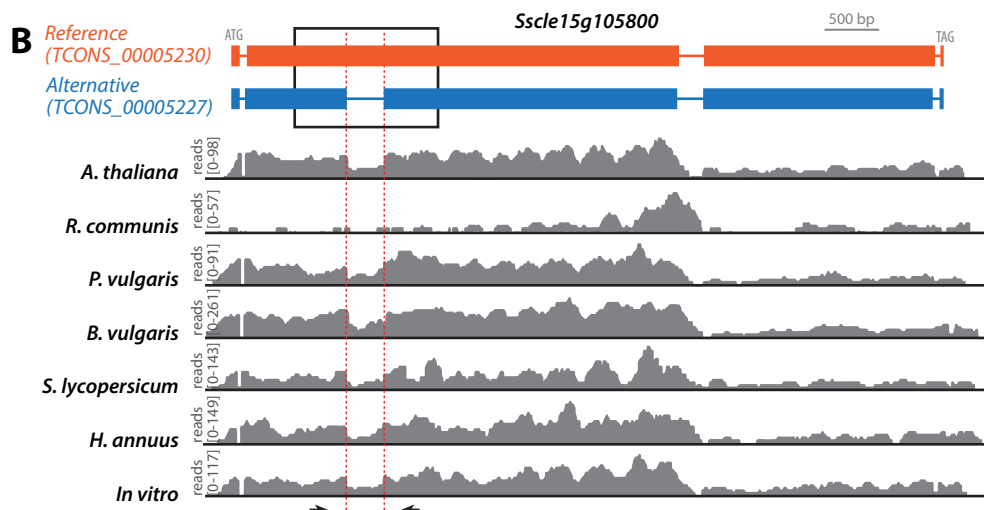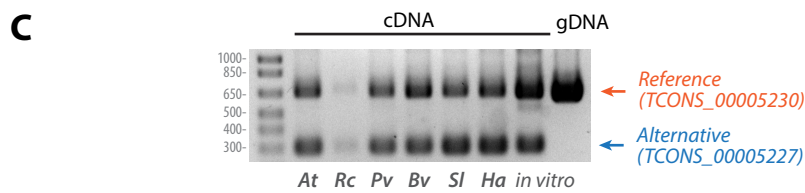

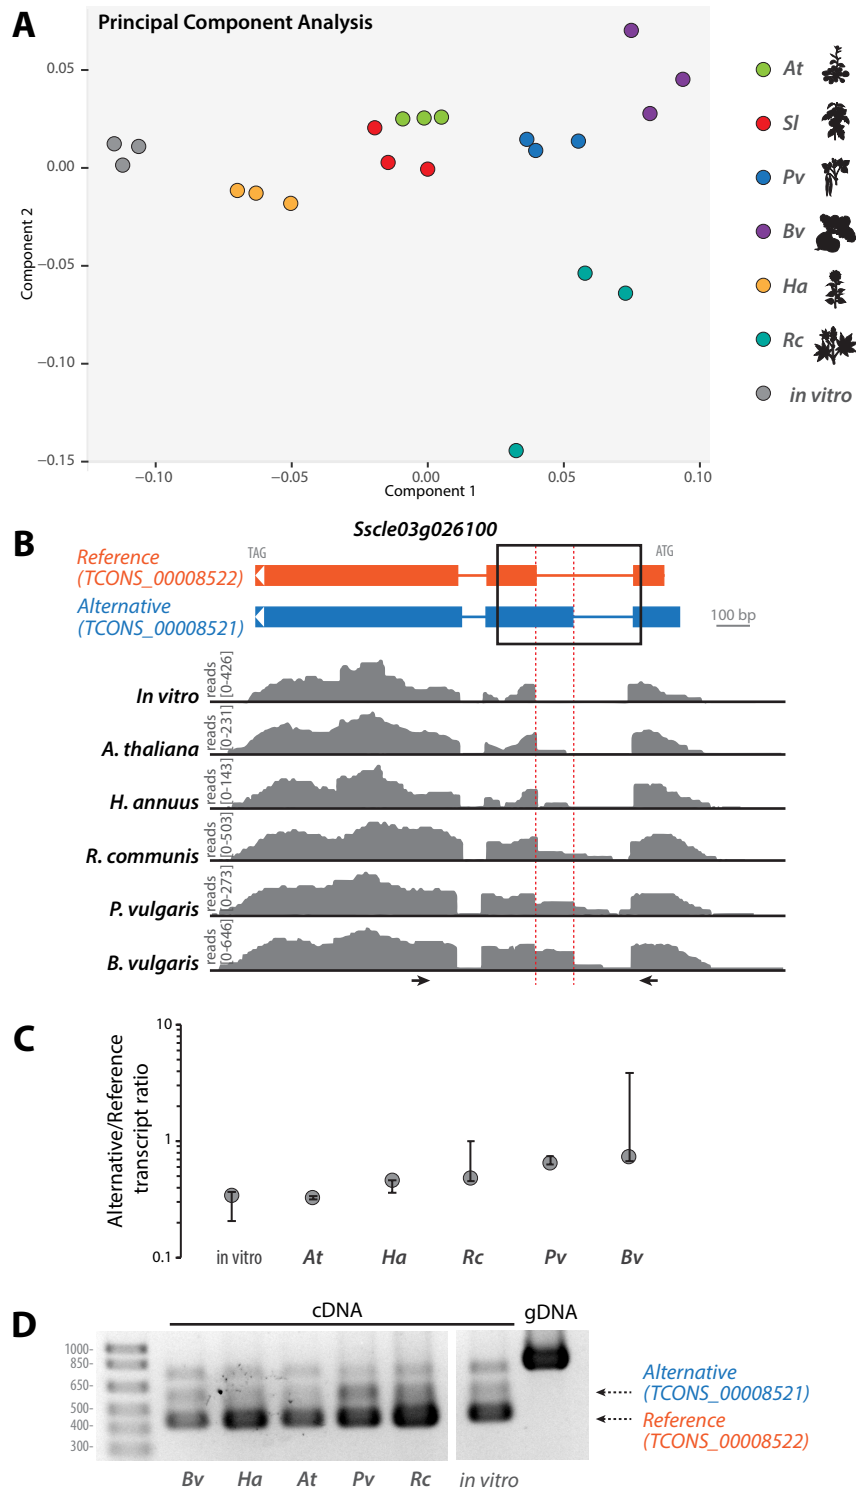

**A**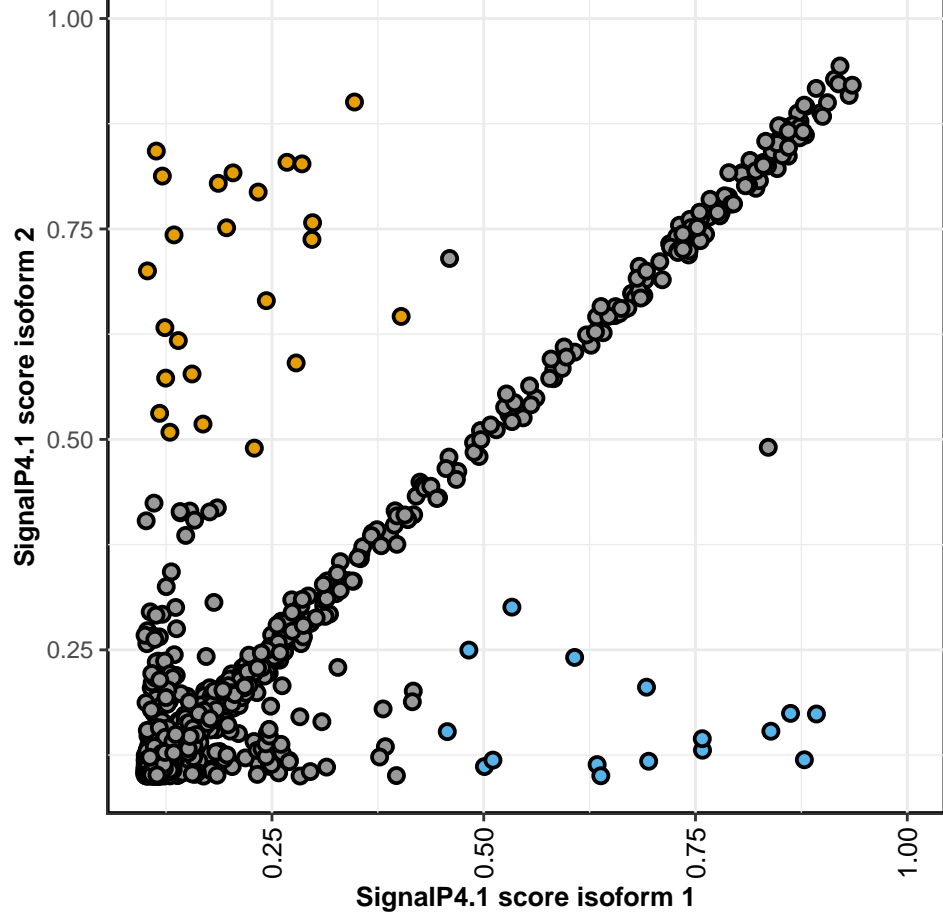**B**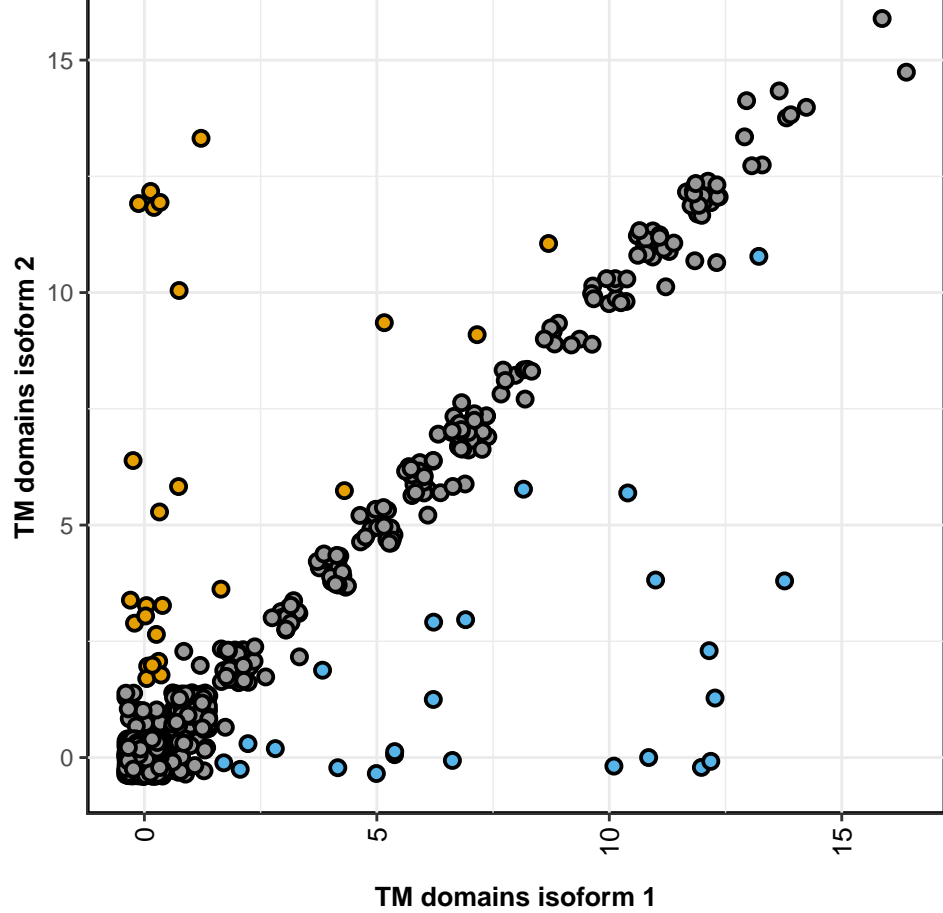

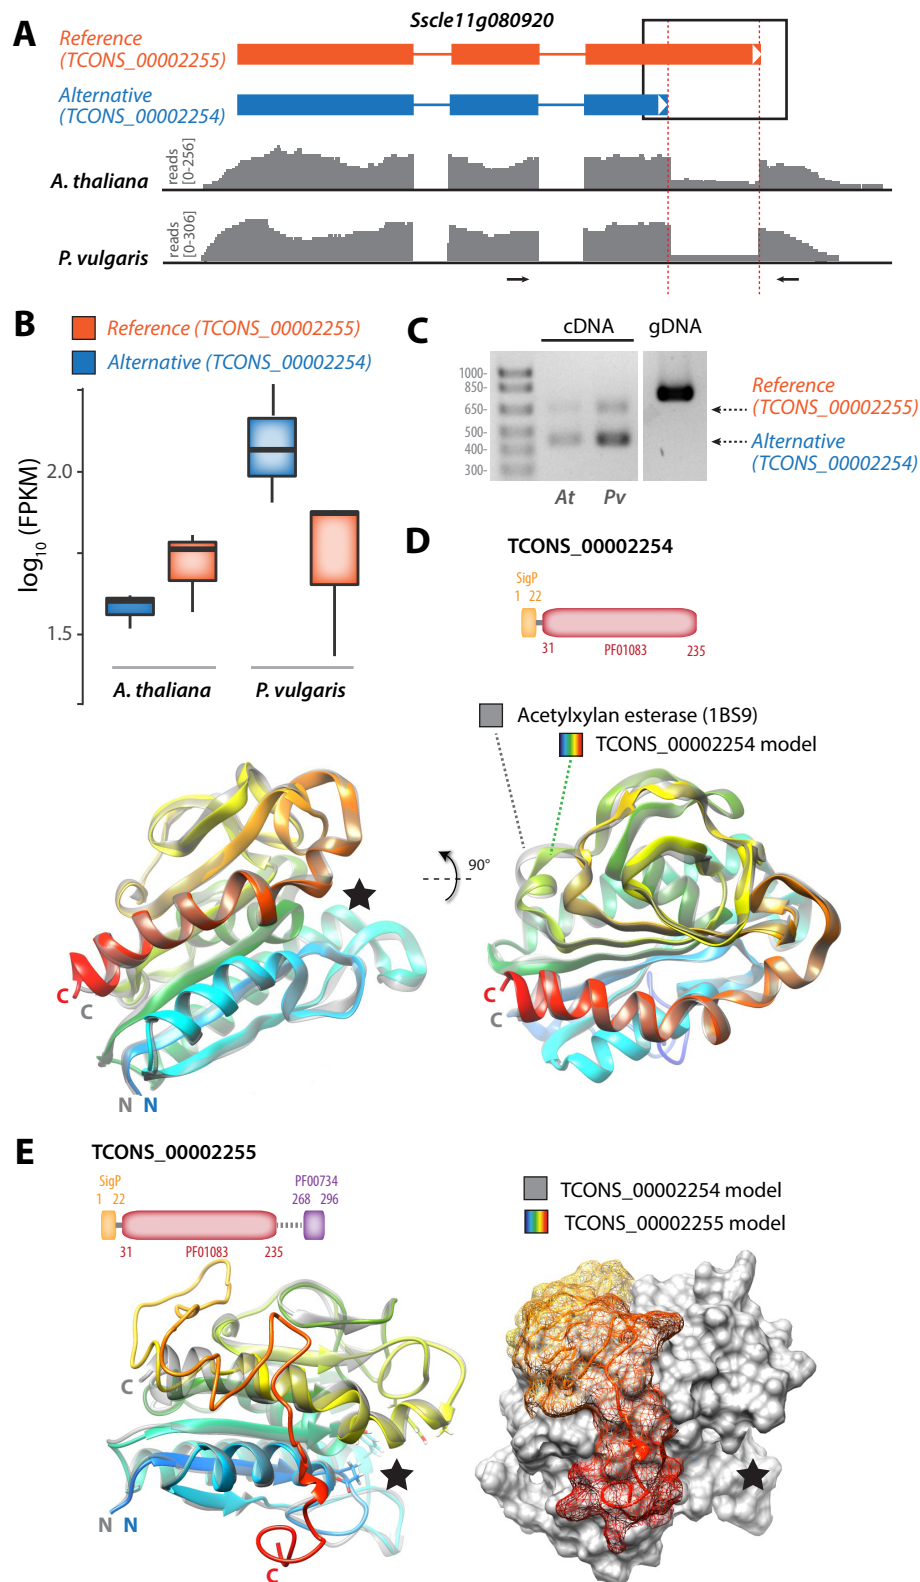

Source: https://www.biorxiv.org/content/10.1101/2020.05.13.094565v1.full.pdf
